## Title

The VTA-BLA-NAc circuit for sex reward inhibited by VTA GABAergic neurons under stress in male mice

## Authors

Linshan Sun<sup>1, †</sup>, Jingjing You<sup>1, †</sup>, Minghu Cui<sup>3</sup>, Fengjiao Sun<sup>1</sup>, Jiangong Wang<sup>1</sup>, Wentao Wang<sup>1</sup>, Dan Wang<sup>1</sup>, Dunjiang Liu<sup>1</sup>, Zhicheng Xu<sup>1</sup>, Changyun Qiu<sup>1</sup>, Bin Liu<sup>1, \*</sup>, Haijing Yan<sup>1,2, \*\*</sup>.

1 Institute for Metabolic & Neuropsychiatric Disorders, Binzhou Medical University Hospital, 256603, Binzhou, Shandong, China

2 Department of Pharmacology, College of Basic Medicine, Binzhou Medical University, 264003, Yantai, Shandong, China

3 Department of Psychiatry, Binzhou Medical University Hospital, 256603, Binzhou, Shandong, China

\*Corresponding author. Tel: +86 543 3258864; E-mail: liubin3714@126.com

\*\*Corresponding author. Tel: +86 535 6915253; E-mail: hjyan211@163.com

† These authors contributed equally to this work

## Running title

GABA neurons inhibit VTA-BLA-NAc circuit

## Abstract

Anhedonia, inability to experience pleasure from rewarding or enjoyable activities, is the prominent symptom of depression that involves dysfunction of the reward processing system. Both genetic predisposition and life events are

thought to increase the risk for depression, in particular life stress. The cellular mechanism underlying stress modulating the reward processing neural circuits and subsequently disrupting reward-related behaviors remains elusive. We identify the VTA-BLA-NAc pathway as being activated by sex reward. Blockade of this circuit induces depressive-like behaviors, while reactivation of VTA neurons associated with sexual rewarding experience acutely ameliorates the impairment of reward-seeking behaviors induced by chronic restraint stress. Our histological and electrophysiological results show that the VTA neuron subpopulation responding to restraint stress inhibits the responsiveness of the VTA dopaminergic neurons to sexual reward. Together, these results reveal the cellular mechanism by which stress influences the brain reward processing system and provide a potential target for depression treatment.

## **Keywords**

Anhedonia/ chronic stress/ VTA-BLA-NAc circuit/ VTA dopaminergic neurons/  
VTA GABAergic neurons

## Introduction

Depression, one of the world's greatest public health problems, is heterogeneous in aetiology, pathology and treatment responses (Garriock et al, 2010; Fabbri et al, 2017). The existing antidepressant medications, acting on the brain's serotonergic or noradrenergic systems, usually need at least several weeks to show alleviation effect in depressive symptomatology (Ressler & Nemeroff, 2000; Nestler et al, 2002; Morilak & Frazer, 2004), while approximately 30% of patients show little improvement, who are therefore defined as having treatment-resistant depression (TRD) (Gaynes et al, 2020; Sackeim, 2001; Davidson et al, 2020). Anhedonia, the inability to experience pleasure and insensitivity to naturally rewarding stimuli, is a prominent clinical feature of depression and is considered a potential predictive clinical sign of TRD (McMakin et al, 2012; DeWilde et al, 2015). Accumulating evidence strongly supports dysfunction of the brain reward processing system in depression (Rappaport et al, 2020; Coccarello, 2019).

The mesolimbic system, originating from the ventral tegmental area (VTA) dopaminergic (DA) neurons which project to the nucleus accumbens (NAc), has been extensively involved in regulating motivated behaviors related to reward stimuli and reward-predictive cues (Halbout et al, 2019; Ostlund et al, 2014; Wassum et al, 2013; Yuan et al, 2019), and its abnormalities are associated with Depressive-like behaviors (Krishnan et al, 2007; Chaudhury et

al, 2013; Cao et al, 2010). The VTA-NAc pathway does not regulate reward-related behaviors as an independent brain structure, but functions as part of an overlapping and interacting neural circuit. The VTA and NAc receive glutamatergic inputs from the medial prefrontal cortex (mPFC), hippocampus and basolateral amygdala (BLA) (Sesack & Grace, 2010; French & Totterdell, 2003; MacAskill et al, 2012; Britt et al, 2012; Hyman & Malenka, 2001; Nestler & Lüscher, 2019). In return, the VTA neurons also affect the functions of mPFC and hippocampus through axonal innervation (Wittmann et al, 2005; Duszkiwicz et al, 2019; Liu D et al, 2018; Popescu et al, 2016). A surge of research suggests that BLA plays an important role in reward processing , particularly in reward learning and goal-directed behaviors (Kim et al, 2016; Wassum & Izquierdo, 2015). The excitatory transmission from BLA to NAc increases cue-triggered motivated behaviors and supports positive reinforcement (Gore et al, 2015; Di Ciano & Everitt, 2004; Setlow et al, 2002; Stuber et al, 2011). The dopaminergic projections from the VTA to NAc are required for appropriate reward-seeking behaviors regulated by the BLA-NAc pathway (Ambroggi et al, 2008; Stuber et al, 2011). In addition, some neuropharmacological evidence indicates that the VTA may control the activity of BLA-NAc pathway through axonal innervation on BLA neurons (Di Ciano & Everitt, 2004; Lintas et al, 2011). Neverthelss, further research, especially anatomical evidence, is needed to elucidate the neural circuit.

The VTA, a hub of the mesolimbic system that serves an essential role in

both reward and aversion (Koob & Le Moal, 2001; de Jong et al, 2019; Russo & Nestler, 2013; Watabe-Uchida et al, 2017), is a heterogeneous brain structure containing dopaminergic (65%), GABAergic (30%) and glutamatergic (5%) neurons (Margolis et al, 2006; Nair-Roberts et al, 2008). The VTA dopaminergic neurons, the primary focus of research on this brain region, have been involved in not only processing rewards and reward-predictive cues (Schultz, 2006; Bayer & Glimcher, 2005), but also responding to aversive and alerting events (de Jong et al, 2019; Bromberg-Martin et al, 2010), and abnormalities in the function of VTA dopaminergic neurons are linked to several neuropsychiatric disorders, including addiction, schizophrenia and depression (Chaudhury et al, 2013; Willuhn et al, 2010; Guillin et al, 2007; Dunlop & Nemeroff, 2007; Nestler & Carlezon, 2006). It is well established that the VTA dopaminergic neurons exhibit rapid and brief burst firing in response to unexpected rewarding stimuli or reward-cues (Watabe-Uchida et al, 2017; Pignatelli & Bonci, 2015). Some studies suggest that the VTA dopaminergic neurons are inhibited by the aversive events (Ungless et al, 2004; Matsumoto & Hikosaka, 2009), while there are paradoxical evidence showing that the VTA dopaminergic neurons are also activated by aversive stimuli (Brischoux et al, 2009; Budygin et al, 2012). Recent research has revealed that the VTA GABAergic neurons are also involved in mediating both reward and aversion (Tan et al, 2012; van Zessen et al, 2012), and are strongly modulated by stress (Tan et al, 2012; Ostroumov et al, 2016), which indicating a potential role in

stress-related neuropsychiatric disorders such as depression and post-traumatic stress disorder (PTSD). Research data have shown that VTA GABAergic neurons synapse onto local VTA dopaminergic neurons and exhibit inhibitory effects on addiction and aversion (Matsui et al, 2014; Matsui et al, 2011; Polter et al, 2018; Tan et al, 2012). Despite these knowledge, the role of VTA neurons in normal reward-related behaviors, such as food and sex, remains to be determined, which may help us to further understand the mechanism by which stress induces anhedonia.

## **Results**

### **Brain areas activated during positive experience**

To identify brain regions that are activated during a sexual rewarding experience, we caged male mice with female mice for 2 hours (hereafter referred to as a 'positive experience') and then performed brain-wide immunofluorescent staining of c-Fos. The histological data showed that there was c-Fos expression in several brain areas, including the basolateral amygdala (BLA), nucleus accumbens (NAc), medial prefrontal cortex (mPFC), ventral tegmental area (VTA), substantia nigra (SN), interpeduncular nucleus (IPN), and dentate gyrus (DG), which all have been implicated in reward processing and motivated behaviors (Zhang et al, 2020; LeGates et al, 2018; Ferenczi et al, 2016; Lammel et al, 2012; Ilango et al, 2014; McLaughlin et al, 2017; Ramirez et al, 2015), in both neutral experience and positive experience mice (Fig 1A-1E'). Positive experience mice exhibited

more c-Fos-expressing cells in the BLA, NAc and VTA (Fig 1F, 1G and 1I), but not in the mPFC, SN, IPN or DG (Fig 1H, 1J, 1K and 1L). These results suggest that VTA, BLA and NAc are activated by positive experience and may be involved in processing the sexual reward.

### **Reactivation of hM3D-labeled VTA neurons during positive experience increases c-Fos expression in BLA and NAc**

The VTA plays a central role in reward processing and motivated behaviors through diverse projections to target brain regions, including BLA, NAc and mPFC (Lintas et al, 2011; Beier et al, 2015; Pignatelli & Bonci, 2018; Heymann et al, 2020; Hauser et al, 2017; Kumar et al, 2018; Pessiglione et al, 2006). The BLA has a crucial role in cue-triggered motivated behaviors and its glutamatergic inputs to the NAc has been implicated in reward-seeking behaviors (Ambroggi et al, 2008; Di Ciano & Everitt, 2004; Stuber et al, 2011). A previous pharmacology study indicated that the VTA-BLA-NAc circuit was involved in opiate-related reward processing, but did not provide direct clear anatomical evidence for this circuit (Lintas et al, 2011). We therefore investigated whether the VTA–BLA–NAc circuit was indeed activated during the positive experience. To address this issue, we injected AAV-DIO-hM3D-mCherry into the VTA of Fos-CreER<sup>T2</sup> mice. After exposure to conspecific females, Fos-CreER<sup>T2</sup> male mice were intraperitoneally injected with 4-hydroxytamoxifen (4-OHT, 50 mg/kg) to induce the expression of hM3D-mCherry to label VTA-activated neurons during that positive experience.

Three weeks later, we intraperitoneally injected clozapine-N-oxide (CNO, 0.3mg/kg) to activate previous hM3D-mCherry-labeled VTA neurons (Fig 2A). Consistent with increase of c-Fos expression in VTA (Fig 1D, 1D' and 1I), positive experience induced more hM3D-mCherry-labeled VTA neurons (Fig 2B, 2B' and 2I). Consequently, there were more c-Fos-positive VTA neurons after intraperitoneal injection of CNO (Fig 2C, 2C' and 2I'). Previous studies showed that VTA neurons could be excited by both rewarding and aversive stimuli (Lintas et al, 2011; Beier et al, 2015; Pignatelli & Bonci, 2018; Heymann et al, 2020). As there might be some alerting cues and aversive stimuli throughout the operation of CNO injection, such as catching mice and intraperitoneal injection, we gently handled mice to reduce aversive stimuli. Our data showed that the vast majority of the c-Fos-positive VTA neurons were hM3D-mCherry-labeled in both groups (Fig 2D, 2D' and 2I'', neutral  $81.53 \pm 5.510\%$ , positive  $86.41 \pm 1.888\%$ ), suggesting that the VTA c-Fos expression was induced predominantly through activating hM3D by CNO. We next checked the c-Fos expression in other brain areas that were activated during the positive experience (Fig 1). Reactivation of VTA neurons labelled by positive experience correlated with increase of c-Fos expression in BLA (Fig 2E, 2E' and 2L) and NAc (Fig 2F, 2F' and 2M), but not in SN (Fig 2C, 2C' and 2J), IPN (Fig 2C, 2C' and 2K), mPFC (Fig 2G, 2G' and 2N), or DG (Fig 2H, 2H' and 2O). Together, these results suggest that VTA may be upstream of BLA and NAc during the positive experience.



## **VTA-BLA-NAc pathway is activated by positive experience**

To verify the hypothetical circuit architecture, i.e. neurons in VTA synapse onto BLA neurons projecting to specific neurons in NAc, we injected AAV-WGA-Cre-T2A-ZsGreen and AAV-DIO-mCherry into VTA and BLA respectively (Fig 2P). The AAV-WGA-Cre-T2A-ZsGreen virus contains transsynaptic tracer wheat-germ agglutinin (WGA) fused to Cre-recombinase, a ZsGreen reporter, and a linker peptide T2A (2A peptide derived from insect *Thosea asigna* virus) whose “self-cleaving” would generate two proteins, WGA-Cre and ZsGreen (Hadpech et al, 2018). ZsGreen would label the virus infected VTA neurons (Fig 2Q) and WGA-Cre would be released into synaptic cleft and taken up by the adjacent neuron (Libbrecht et al, 2017). As WGA-Cre could undergo both anterograde and retrograde transneuronal transfer (Yoshihara et al, 1999; Horowitz et al, 1999), WGA-Cre could enter BLA neurons projecting to or receiving inputs from VTA, and induce mCherry expression in the AAV-DIO-mCherry-infected BLA neurons (Fig 2R). We observed strong mCherry positive fibers in NAc (Fig 2S) that should be derived from mCherry-labeled BLA neurons receiving inputs from VTA. These results supported the hypothetical architecture of neural circuit that neurons in BLA synapsing onto NAc neurons received inputs from VTA neurons, and indicated that reactivation of VTA neurons labelled by positive experience may increase c-Fos expression in BLA and VTA through the VTA-BLA-NAc pathway, but did not rule out the possibility that increasing c-Fos expression through VTA-BLA

or VTA-NAc pathways.

To address this issue, we performed the pseudotyped rabies virus (RABV)-based monosynaptic retrograde tracing (Tervo et al, 2016; Wickersham et al, 2007). The AAV-Retro-GFP was injected into NAc (Fig 2U) to label projection neurons from BLA and VTA (Fig 2V and 2X). C-Fos staining revealed activated neurons in BLA and NAc during positive experience (Fig 2V' and 2X'). The c-Fos positive BLA neurons were mostly GFP-labelled (Fig 2V'' and 2W,  $90.97 \pm 1.862\%$ ,  $n=4$ ), whereas few c-Fos positive VTA neurons were GFP-labelled (Fig 2X'' and 2Y,  $11.03 \pm 2.189\%$ ,  $n=4$ ). Collectively, our data showed that most BLA neurons projecting to NAc were activated by positive experience, whereas only a minority of VTA neurons projecting to NAc were activated, suggesting that reactivation of VTA neurons previously activated by positive experience may activate NAc through the VTA-BLA-NAc pathway.

### **Blocking the VTA-BLA-NAc circuit induces depressive-like behaviors**

It has become clear that dysfunctions of specific brain networks mediating mood and reward signals underly a variety of mood disorders, including depression and anxiety (Nestler, 2015; Lammel et al, 2014; Kauffling et al, 2017; Stamatakis et al, 2014; Lebow & Chen, 2016). To determine whether blocking the VTA-BLA-NAc circuit responding to positive experience would induce depressive-like behaviors, we injected AAV-DIO-hM4D-mCherry (AAV-DIO-mCherry as control) into VTA or BLA and simultaneously implanted bilateral cannula into BLA or NAc of Fos-CreER<sup>T2</sup> mice. After three weeks, the

mice were exposed to conspecific females for two hours and then immediately received intraperitoneal injection of 4-OHT to induce activity-dependent hM4D-mCherry labelling of VTA or BLA neurons activated by the positive experience. Three weeks later, the mice were subjected to behavioral tests while the synaptic communication from VTA to BLA or from BLA to NAc was silenced through bilateral infusion of CNO (900 pmol/0.3µl /side) into BLA or NAc (Stachniak et al, 2014; Rinker et al, 2017; Mahler et al, 2014) (Fig 3A and 3E).

We performed female urine sniff test (FUST) and sucrose preference test (SPT) to evaluate the depression level. Anhedonia is a prominent symptom of depression, which is inability to experience pleasure from previously pleasurable activities, such as sex and food (Coccurello, 2019; Rizvi et al, 2016). FUST and SPT measure anhedonia in mice based on reward-seeking behaviors on female pheromonal odors and sucrose respectively (Malkesman et al, 2010; Liu MY et al, 2018). Our data showed that blocking the VTA-BLA pathway responding to positive experience caused decrease in both sniff time (Fig 3B) and sucrose preference (Fig 3C), but did not affect the locomotor activity (Fig 3D). Similar results were obtained when blocking the BLA-NAc pathway (Fig 3F-H). Collectively, these results showed that blocking the VTA-BLA-NAc circuit responding to positive experience induced depressive-like behaviors, indicating a possibility that reactivating the VTA neurons previously activated by positive experience may ameliorate the

depressive symptoms.

## **Reactivation of the VTA neurons previously activated by positive experience reverses chronic restraint stress-induced depressive-like behaviors**

Previous studies suggest that malfunctions of the brain's reward circuits play an important role in mediating stress-elicited depression-like behaviors (Lammel et al, 2014; Kaufling et al, 2017). We therefore examined whether reactivation of the VTA neurons previously activated during positive experience could ameliorate depressive-like behaviors induced by chronic restraint stress (Fig 4A). First, Fos-CreER<sup>T2</sup> mice were injected with AAV-DIO-hM3D-mCherry into the VTA and individually housed until the end of all experiments. Mice were assigned into two groups with no statistical difference in SPT or FUST (Fig 4B and 4C, Basal). Positive experience mice were housed with oestrous female mice for 2 hours, and the neutral experience mice was housed with fake toy mice. Then immediately, all mice received intraperitoneal injection of 4-OHT to allow activity-dependent hM3D-mCherry labelling of VTA neurons activated by the positive experience. The following behavioral experiments were all carried out 45 min after CNO injection. Two weeks later, the SPT showed no difference between the two groups (Fig 4B, Basal-CNO), while the FUST showed significant increase in sniffing time in positive experience mice (Fig 4C, Basal-CNO). After 15 days of restraint stress treatment, positive experience mice exhibited more sucrose preference (Fig 4B, Restraint-CNO)

and sniffing time (Fig 4C, Restraint-CNO). Forced swim test (FST) is widely used to assess learned helplessness, another feature of depressive-like behavior, by measuring the immobility time (Cryan & Holmes, 2005). Positive experience mice exhibited reduced immobility time (Fig 4D, left), but no change in the latency to immobility from the start of the test (Fig 4D, right). The total distance travelled suggested that there was no significant difference in locomotor activity between the two groups (Fig 4E). Together, these results suggest that reactivation of VTA neurons responding to positive experience can ameliorate depressive-like behaviors induced by chronic restraint stress.

### **Distinct subpopulations of VTA neurons activated by positive experience and restraint stress**

The VTA is a heterogeneous nucleus including dopaminergic (DAergic), Gamma-aminobutyric acid-ergic (GABAergic), and glutamatergic (Glutergic) neurons, in which DAergic neurons predominate, making up about 55%-65% of the total neurons (Margolis et al, 2006; Tan et al, 2012; Morales & Margolis, 2017). VTA dopaminergic neurons respond not only to rewards and reward-predicting stimuli, but also to aversion, alerting events and behavioral choices (Bayer & Glimcher, 2005; Brischoux et al, 2009; Dautan et al, 2016; Zhou et al, 2019; Howard et al, 2017). This functional heterogeneity is reflected in the anatomically heterogeneous dopaminergic subpopulations connecting with different brain regions (Bromberg-Martin et al, 2010; Engelhard et al, 2019). To clarify the underlying mechanism by which

reactivation of VTA neurons activated by positive experience ameliorates the chronic restraint stress-induced depression, we first identified the neuron subpopulation activated during positive experience. We performed c-Fos staining after positive experience in DAT-IRES-Cre;Ai14 mice (Fig 5I), in which tdTomato was exclusively colocalized with the dopaminergic neuron marker TH ( $97.67\pm 0.7862\%$ ,  $n=4$ ) (Fig 5A-5H), confirming DAT-IRES-Cre-mediated recombination was dopaminergic neuron-specific. Our results showed that the VTA c-Fos positive neurons labelled by positive experience mostly colocalized with tdTomato in the DAT-IRES-Cre;Ai14 mice ( $68.92\pm 4.902\%$ ,  $n=5$ ) (Fig 5J-5M), suggesting that the neuron subpopulation responding to positive experience is predominantly dopaminergic. Dopaminergic neurons maintain the baseline level of dopamine in downstream neural structures through the tonic firing mode and transit to the phasic burst firing mode to induce a sharp increase in dopamine release in response to both rewarding and aversive/stressful stimuli (Di Ciano & Everitt, 2004; Stuber et al, 2011). We therefore next performed in vivo extracellular recording to examine the activity of VTA dopaminergic neurons after positive experience (Fig 5N) based on the electrophysiological criteria described in previous reports (Tan et al, 2012; Grace & Bunney, 1983; Ungless & Grace, 2012). Consistent with the c-Fos staining results, positive experience increased the number of spontaneously active dopaminergic neurons in the VTA (Fig 5O). The firing rate of spontaneously active dopaminergic neurons was unaffected (Fig 5P), but the

percentage of burst firing significantly increased (Fig 5Q). Collectively, these results suggest that the subpopulation of VTA neurons activated during positive experience are dopaminergic.

We next identified the VTA neuron subpopulation responding to restraint stress. As shown in Fig 6A-6J, restraint stress increased c-Fos expression in VTA, BLA and NAc. We then performed c-Fos staining in VTA of DAT-IRES-Cre;Ai14 mice (Fig 6K) and the result showed that few c-Fos-positive neurons were tdTomato-labelled ( $17.04 \pm 3.513\%$ ,  $n=4$ ) (Fig 6L-6O), suggesting that the activated VTA neurons are mostly non-dopaminergic, indicating that the subpopulation of VTA neurons responding to restraint stress is distinct from that of positive experience. To confirm this observation, we detected both restraint stress- and positive experience-activated neurons in similar brain slices of Fos-CreER<sup>T2</sup> (Fig 6P) and Fos-CreER<sup>T2</sup>; Ai14 mice (Fig 6U). We injected AAV-DIO-GFP into VTA of Fos-CreER<sup>T2</sup> mice which were subsequently subjected to 2 hours of restraint stress and received 4-OHT injection to allow activity-dependent GFP labelling of VTA neurons responding to restraint stress. Three weeks later, we housed these mice with conspecific females and performed c-Fos staining. We observed that the VTA neurons activated by restraint stress (green, Fig 6Q) and positive experience (red, Fig 6R) were anatomically distinct subpopulations (Fig 6S). Statistical analysis showed that there were few c-Fos-immunopositive VTA neurons labelled by GFP ( $3.765 \pm 1.285\%$ ,  $n=5$ ) (Fig

6T). Similar results were observed in Fos-CreER<sup>T2</sup>; Ai14 mice. The VTA neurons responding to restraint stress (tdTomato, red, Fig 6V) were distinct from those of positive experience (c-Fos, green, Fig 6W) and few c-Fos-immunopositive VTA neurons were labelled by tdTomato ( $3.098 \pm 1.412\%$ ,  $n=5$ ) (Fig 6X). These results together suggest that the subpopulation of VTA neurons activated by restraint stress is distinct from that activated by positive experience, raising the question of how the VTA neuron subpopulation responding to restraint stress affects the reward-related behaviors.

### **GABAergic neurons activated by restraint stress inhibit the dopaminergic neurons responding to positive experience**

The majority non-dopaminergic VTA cells are GABAergic neurons, which make up about 30% of the total neurons (Dobi et al, 2010). VTA GABAergic neurons have been recognized as potent mediators of reward and aversion, regulating behavioral outputs through projecting to distal brain regions or inhibiting local VTA dopaminergic neurons (van Zessen et al, 2012; Zhou et al, 2019; Bocklisch et al, 2013; Simmons et al, 2017). It has been previously reported that electric footshock activates VTA GABAergic neurons which inhibit local dopaminergic neurons (Dautan et al, 2016). In our study, the VTA neurons activated by restraint stress were mostly non-dopaminergic (Fig 6O), which suggested a possibility that the VTA non-dopaminergic cells responding to restraint stress were GABAergic neurons which inhibited the VTA dopaminergic neurons activated by positive experience, subsequently



resulting in dysfunctions in reward-seeking behaviors.

To test this possibility, we first identified whether the VTA neurons responding to restraint stress were GABAergic using *Vgat-ires-Cre* mice. We injected AAV-DIO-mCherry into the VTA of *Vgat-ires-Cre* mice. As the Vesicular GABA Amino Acid Transporter (*Vgat*) is expressed by GABAergic neurons (Vong et al, 2011), the expression of mCherry would be induced in VTA GABAergic neurons. Then, we subjected these mice to 2 hours of restraint stress and performed c-Fos staining (Fig 7A). The result showed that most c-Fos-positive neurons were mCherry-labelled ( $79.49 \pm 3.652\%$ ,  $n=5$ ) (Fig 7L-7H), suggesting that the activated VTA neurons are mostly GABAergic. We next performed in vivo extracellular recording to monitor the activity of VTA GABAergic neurons after restraint stress (Fig 7I) based on the electrophysiological criteria described in previous reports (Tan et al, 2012; Steffensen et al, 1998; Ko et al, 2018). Consistent with the histological results, restraint stress increased the number of spontaneous firing GABAergic neurons (Fig 7J), but did not influence their firing rate (Fig 7K), suggesting that the non-dopaminergic cells activated by restraint stress are probably GABAergic neurons. Then, we expressed hM3D selectively in VTA neurons responding to restraint stress by injecting AAV-DIO-hM3D-mCherry (or AAV-DIO-mCherry as control) into VTA of *Fos-CreER<sup>T2</sup>* mice. We subjected these mice to 2 hours of restraint stress and immediately intraperitoneally injected 4-OHT to induce the expression of hM3D in activated VTA neurons.

We performed *in vivo* extracellular recording to monitor the activity of VTA dopaminergic neurons in those mice exposed to conspecific females 45 min after CNO injection (Fig 7L). Reactivation of VTA neurons activated by restraint stress decreased the number (Fig 7M) and percentage of burst firing (Fig 7O) of VTA dopaminergic neurons responding to positive experience, but did not affect their firing rate (Fig 7N). Collectively, our data showed that restraint stress increased the activity of VTA GABAergic neurons which inhibited the activity of VTA dopaminergic neurons responding to positive experience, hence resulting in dysfunction of the reward processing circuit and subsequent depressive-like behaviors.

## **Discussion**

In this study, we used anterograde and retrograde monosynaptic tracing, combining c-Fos immunofluorescence, to elucidate the architecture of the VTA-BLA-NAc circuit activated by sexual reward experience (positive experience). Projection-specific chemogenetic blockade of this circuit induced depression-like behaviors under normal conditions, and reactivation of VTA neurons activated by positive experience could ameliorate depression-like behaviors caused by chronic restraint stress. Furthermore, the subpopulation of VTA neurons responding to positive experience was mostly dopaminergic, while the VTA neurons activated by restraint stress belonged to anatomically distinct cell subpopulation in which non-dopaminergic neurons predominated and exerted inhibitory effect on the dopaminergic neurons activated by positive

experience.

The mesocorticolimbic dopaminergic system originating from the VTA dopaminergic neurons which chiefly project to NAc, BLA, mPFC, and hippocampus, plays an essential role in reward, motivation, cognition, and aversion (Morales & Margolis, 2017; Fields et al, 2007). Its dysfunction has been implicated in many neuropsychiatric disorders including depression (Vrieze et al, 2013), bipolar disorder (Burdick et al, 2014), schizophrenia (Davis et al., 1991), and addiction (Koob & Le Moal, 2001; Loureiro M & Lüscher C, 2018). The VTA-NAc pathway has been extensively studied, which is critical for motivation and reward processing (de Jong et al, 2019; Saddoris et al, 2015; Mohebi et al, 2019), as well as addiction (Martínez-Rivera et al, 2017; Lüscher, 2016). The VTA dopaminergic neurons can facilitate or suppress target NAc neural activity not only directly through dopaminergic receptors residing on NAc neurons (Soares-Cunha et al, 2016; Pascoli et al, 2015), but also by regulating excitatory glutamatergic inputs to NAc neurons originating from BLA via presynaptic mechanisms (Stuber et al, 2011; Charara & Grace, 2003), integrating different inputs and turning them into action via outputs to ventral pallidum (Creed et al, 2016) and lateral hypothalamus (Luo et al, 2018; Maldonado-Irizarry et al, 1995). In our study, positive experience significantly increased active VTA, BLA and NAc neurons (Fig 1), and reactivation of VTA neurons activated by positive experience could enhance the neural activity of BLA and NAc (Fig 2A-2O),

suggesting that BLA and NAc were target nuclei of VTA during positive experience. The results obtained from c-Fos staining experiment combined with retrograde tracing showed that almost all of BLA neurons activated by positive experience synapsed onto NAc (Fig 2V''), while only few activated VTA neurons projected to NAc (Fig 2X''), suggesting that reactivation of VTA neurons activated by positive experience increased the NAc neural activity probably through activating BLA neurons projecting to NAc. There is some evidence obtained from neuropharmacological experiments indicating that the VTA-BLA-NAc neural circuit is involved in modulating rewarding effects and motivated behaviors (Di Ciano & Everitt, 2004; Lintas et al, 2011), but direct anatomical evidence still lacks. We determined the putative neuronal circuit using the WGA-Cre transsynaptic tracing technology (Libbrecht et al, 2017; Hadpech et al, 2018), and the results showed that the mCherry labelled BLA neurons received inputs from VTA and sent projections to NAc (Fig 2P-2S), providing neuroanatomical evidence for the VTA-BLA-NAc circuit.

The prominent clinical feature of depression is anhedonia, and dysfunction of brain reward processing system has been implicated in neuropsychiatric disorders such as bipolar disorder (Caseras et al, 2013), schizophrenia (Strauss & Gold, 2012) and depression (Nestler & Carlezon, 2006; Pizzagalli et al, 2009). To determine whether dysfunction of the VTA-BLA-NAc circuit activated by positive experience induces depressive-like behaviors, we labelled VTA or BLA neurons activated by positive experience

with hM4D in Fos-CreER<sup>T2</sup> mice and selectively inhibited the hM4D-labelled axon terminals projecting from VTA to BLA or from BLA to NAc through infusion of CNO into BLA or NAc, then performed FUST and SPT to evaluate the depression level. Our results showed that blocking the VTA-BLA or BLA-NAc pathways responding to positive experience induced depressive-like behaviors (Fig 3). The present medication treatments for depression, with the view that depression is a general brain dysfunction, take weeks to alleviate depressive symptomatology, while approximately 30% of patients get little improvement and are defined as having treatment-resistant depression (TRD) (Akil et al, 2018; Fogelson & Leuchter, 2017). More focused, targeted treatments that modulate specific brain networks or areas, such as deep brain stimulation (DBS), may prove to be promising approaches to help treatment-resistant patients (Kiening K & Sartorius A, 2013; Mayberg et al, 2005; Dandekar et al, 2018). A recent study by Steve Ramirez and his colleagues demonstrated that activating DG cells associated with positive memory could alleviate chronic stress-induced behavioral impairments (Ramirez et al, 2015). We therefore investigated whether directly activating the neural circuitry responsible for reward processing during positive experience could ameliorate depression-like behaviors induced by chronic restraint stress. We found that reactivating the VTA neurons activated by positive experience through CNO/hM3D system could ameliorate the depressive-like behaviors induced by chronic restraint stress (Fig 4).

The VTA dopaminergic neurons mediate a diverse array of functions associated with distinct axonal targets, including reward-related learning, goal-directed behavior, working memory, and decision making (Morales & Margolis, 2017; Björklund & Dunnett, 2007; Baimel et al, 2017). They exhibit rapid burst firing in response to rewarding stimuli or rewarding cues, subsequently sharply increasing dopamine release on their target brain regions (Watabe-Uchida et al, 2017; Pignatelli & Bonci, 2015; Lohani et al, 2018; Lavin et al, 2005). In our study, VTA neurons activated by positive experience were mostly dopaminergic, and their burst firing increased (Fig 5). Some studies have shown that the VTA dopaminergic neurons are also excited by aversive stimuli (Bromberg-Martin et al, 2010; Brischoux et al, 2009; Budygin et al, 2012), while there are paradoxical reports that they are inhibited by aversive events (Ungless et al, 2004; Matsumoto & Hikosaka, 2009). Recently, increasing evidence suggests that GABAergic neurons of the VTA, the majority of VTA non-dopaminergic neurons, are involved in mediating reward and aversion (Tan et al, 2012; van Zessen et al, 2012; Eshel et al, 2015). In our study, c-Fos staining revealed that restraint stress also induced neuron activation in VTA, BLA and NAc (Fig 6A-6J), but the activated VTA neurons were mostly non-dopaminergic (Fig 6K-6O). Consistent with a previous report that aversive stimulus activated VTA GABAergic neurons (Tan et al, 2012), our histological and electrophysiological results showed that restraint stress increased the number of spontaneously active GABAergic

neurons in VTA (Fig 7A-7K), indicating the activated non-dopaminergic neurons were probably GABAergic. Our data suggested that the VTA may process reward and aversive stimuli through dopaminergic and GABAergic neurons respectively. Given the difference in VTA neuron types responding to restraint stress and sexual reward, how does restraint stress influence the performance of reward-seeking behaviors (Fig 4). Our results revealed the distinct anatomical locations of these two VTA neuron subpopulations (Fig 6P-6Y), but we noticed that the restraint stress-responding neurons sent fibers to the anatomic location of positive experience-responding neurons, indicating that there may be synaptic connections between these distinct neuron subpopulations. It is generally accepted that the VTA GABAergic neurons promote aversive behaviors through inhibiting VTA dopaminergic neurons (Tan et al, 2012; Bocklisch et al, 2013), prompting us to determine whether VTA neurons activated by restraint stress inhibited the responsiveness of VTA dopaminergic neurons to positive experience. Positive experience increased the number of active dopaminergic neurons and the percentage of burst firing neurons (Fig 5N-5Q), which would be inhibited by reactivation of VTA neurons activated by restraint stress (Fig 7L-7O). Our data was similar and consistent with a previous study by Ruud van Zessen and his colleagues, which showed that nonspecific activation of the VTA GABA neurons reduced the excitability of neighboring VTA dopaminergic neurons in vitro (van Zessen et al, 2012), while our work specifically targeted the VTA neuron subpopulation responding

to restraint stress and provided electrophysiological evidence in vivo. Repeatedly activating the VTA neuron subpopulation responding to restraint stress may reduce the excitability and responsiveness of the VTA neuron subpopulation processing reward stimuli, which may be the underlying mechanism by which chronic stress induces impaired reward-seeking behaviors. This needs to be clarified in future studies.

In conclusion, we show that the VTA-BLA-NAc circuit, whose dysfunction would induce depressive-like behaviors, is activated by positive experience, and reactivation of the VTA neurons activated by positive experience can ameliorate the depressive-like behaviors induced by chronic restraint stress. Furthermore, we reveal that reactivation of VTA neuron subpopulation responding to restraint stress inhibits the activity of the VTA neurons responding to positive experience, and that this may be the mechanism by which chronic restraint stress may induce anhedonia, the core feature of depression.

## **Materials and Methods**

### **Animals**

C57BL/6 mice were purchased from the Pengyue Laboratory of China, and transgenic mice (DAT-IRES-Cre, 006660; Ai14, 007908; Fos-CreER<sup>T2</sup>, 021882; Vgat-IRES-Cre, 016962) were purchased from the Jackson Laboratories. The protocols of the animal studies were approved by the Institutional Animal Care and Use Committee of Binzhou Medical University Hospital and performed in



compliance with the National Institutes of Health Guide for the Care and Use of Laboratory Animals. Efforts were made to minimize animal suffering and the number of animals used.

### **AAV virus**

AAV2/9-hSyn-DIO-hm3D(Gq)-mCherry (in the main text referred to as AAV-DIO-hm3D-mCherry), AAV2/9-hSyn-DIO-hm4D(Gi)-mCherry (in the main text referred to as AAV-DIO-hm4D-mCherry), AAV2/9-hsyn-DIO-mCherry (in the main text referred to as AAV-DIO-mCherry), AAV2/9-hsyn-WGA-Cre-T2A-ZsGreen (in the main text referred to as AAV-hSyn-WGA-Cre-T2A-ZsGreen), AAV2-CAG-Retro-GFP (in the main text referred to as AAV-Retro-GFP) were purchased from Shanghai Hanheng Biotechnology, China.

### **Drugs**

Clozapine-N-oxide (CNO) was purchased from Sigma, dissolved in saline at a concentration of 0.5 mg/ml and diluted in saline to a final concentration of 0.03 mg/ml (hm3D) for intraperitoneal injection. For intra-BLA and NAc microinjection (hm4D), CNO was diluted in saline to a final concentration of 3mM. 4-Hydroxytamoxifen (4-OHT) was purchased from Sigma and dissolved in ethanol. Corn oil (Sigma) was added to the 4-OHT solution, which was shaken and mixed at 37°C, put in a fume hood for ethanol volatilization to a final concentration of 5 mg/ml and stored at -20°C with protection from light.

## **Stereotaxic surgery**

For microinjection of AAV virus, mice were anaesthetized and mounted onto a stereotaxic frame (KOPF, USA). AAV virus was injected with a glass pipette using an infusion pump (Micro 4, WPI, USA). Viruses were injected bilaterally into target brain areas using the following coordinates: VTA, AP=-3.30 mm, ML=  $\pm$  0.50 mm, DV=-4.20 mm, from bregma; flow rate of 0.10  $\mu$ l/min and total volume of 1.00  $\mu$ l (0.50  $\mu$ l/side); NAc, AP=+1.30 mm, ML=  $\pm$  0.50 mm, DV=-4.80 mm, from bregma; flow rate of 0.10  $\mu$ l/min and total volume of 0.60  $\mu$ l (0.30  $\mu$ l/side); BLA, AP=-1.80 mm, ML=  $\pm$  3.00 mm, DV=-4.80 mm from bregma, flow rate of 0.10  $\mu$ l/min and total volume of 0.60  $\mu$ l (0.30  $\mu$ l/side). An additional 5 min was allowed for diffusion and prevention of backflow. Behavioral tests or in vivo extracellular recordings were conducted 21 days after AAV injection.

For BLA and NAc cannula implantation, adult male C57BL/6 mice were anaesthetized and mounted onto a stereotaxic frame (KOPF, US). The skull surface was coated with Kerr phosphoric acid gel etchant (Kerr USA). First, a bilateral guide cannula was inserted into the BLA (coordinates: 1.7mm posterior to bregma, 3.0 mm lateral to midline, and 3.8 mm ventral to dorsal) or NAc (coordinates: 1.4 mm anterior to bregma, 0.5 mm lateral to midline, and 3.8 mm ventral to dorsal). Then, adhesive (GLUMA, Germany) was applied onto the skull and cannula surface, and Resina fluida (Filtek Z350 XT 3M, USA) was brushed on top with light curing for 45 seconds using a VALO

curing light (Ultradent Products). Finally, dental cement was used to seal the cannula, and a dummy cannula was inserted into the guide cannula to maintain unobstructed cannula. After surgery, animals were individually housed and then allowed to recover for 21 days with daily handling. Mice were conscious, unrestrained and freely moving in their home cages during the microinjections. On the experimental day, a 33-G stainless-steel injector connected to a 5- $\mu$ l syringe was inserted into the guide cannula and extended 1 mm beyond the tip of the guide cannula. CNO (900pmol/0.3 $\mu$ l/side) or vehicle was infused bilaterally over 2.5 min. The injector tips were held in place for an additional 5 min after the end of infusion to avoid backflow through the needle track. Behavioral tests were performed 45 min after microinjections.

### **Electrophysiology**

Mice were anaesthetized with 4% chloral hydrate (400 mg/kg, intraperitoneally). The core body temperature was sustained at 37°C via a thermostatically controlled heating pad during the whole process. Nine electrode tracks (100 $\mu$ m interval, grid pattern) were placed in the VTA (coordinates: 3.3 to 3.5 mm posterior to the bregma, 0.3 to 0.5 mm lateral to the midline, and 3.5 to 5.0 mm below the brain surface). Putative VTA dopamine and GABA neurons were identified using established electrophysiological criteria (dopamine neurons: unfiltered waveform duration >2.2 ms overall, start-to-trough waveform duration  $\geq$ 1.1 ms with

high-pass filter, firing rate range from 0.5 to 10 Hz (Tan et al, 2012; Grace & Bunney, 1983; Ungless & Grace, 2012); GABA neurons: waveform duration <1 ms, firing rate range from 5 to 60 Hz (Tan et al, 2012; Steffensen et al, 1998; Ko et al, 2018)). The recording time for each neuron was over 3 min. Three parameters of VTA dopamine neuron activity were measured: (1). the number of spontaneously active dopamine neurons per track; (2). average firing rate; and (3) average percentage of burst firing, which is defined as the occurrence of two consecutive spikes with an inter-spike interval <80 ms, and the termination of a burst defined as two spikes with an inter-spike interval >160 ms (Grace & Bunney, 1983; Ungless & Grace, 2012).

### **Immunohistochemistry and cell counting**

Mice were anaesthetized and transcardially perfused with cold PBS and 4% paraformaldehyde (PFA) sequentially. Mouse brains were maintained in 4% PFA at 4°C overnight and then dehydrated in 30% sucrose for 2 days. Coronal sections (40µm) containing the target brain region were obtained using a freezing microtome (Leica, CM1950). The sections were incubated in blocking buffer (10% normal goat serum, 0.3% Triton X-100) for 1 hour at room temperature and then incubated with one or two primary antibodies overnight at 4°C, followed by rinsing in PBS buffer and secondary antibody incubation for 4 hours at room temperature. The sections were mounted with Gold antifade reagent containing DAPI (Invitrogen, Thermo Fisher Scientific). An Olympus FV10 microscope was used to capture images. Primary antibodies: c-Fos

(CST, #2250) and tyrosine hydroxylase (TH) (ImmunoStar, #22941). The numbers of c-Fos, TH, GFP, mCherry and tdTomato positive cells were counted bilaterally by experimenters who were blind to the treatments. For each brain, the counting criteria for interested brain regions is described as follow: BLA, 3-4 slice, (every ninth section, from 0.94mm to 2.18 posterior to bregma); NAc, 3-4 slice, (every fourth section, from 1.78mm to 1.10 anterior to bregma); mPFC, 3-4 slice, (every third section, from 1.98mm to 1.54 mm anterior to bregma); VTA, IPN, and SN, 3-4 slice, (every third section, from 3.16mm to 3.64 posterior to bregma); DG, 3-4 slice, (every sixth section, from 1.46mm to 2.54 posterior to bregma). For each brain, the number of immunopositive cells of interested brain regions of per section was calculated by dividing the total number of immunopositive cells in all selected sections by the number of selected sections. For co-immuno experiments, using the percentage of TH positive of tdTomato labelled cells in VTA (Fig 5H) as an example, we divided the total number of co-immuno cells (TH+/tdTomato+) in VTA of all selected slices by the total number of tdTomato positive cells in VTA of all selected slices.

## **Behavioral procedures**

### **Positive experience (sex reward) and neutral experience**

On the experimental day, both groups mice were moved to a behavior room with dim lighting conditions and housed individually. After 4 hours of

habituation, positive experience group male mice were exposed to oestrous female mice for 2 hours. For neutral experience, male mice were housed with fake toy mice.

### **Acute and chronic restraint stress**

Mice were moved to a behavior room on the experimental day and housed individually. After 4 hours of habituation, mice were exposed to two hours of restraint stress. Control mice were housed individually in the behavior room for 6 hours without any treatment. For chronic restraint stress treatment, stress group mice were subjected to 2 hours of restraint for 15 consecutive days.

### **Female urine sniffing test (FUST)**

The female urine sniffing test was performed as previously described (Malkesman et al, 2010). On the experimental day, mice were transferred to a dimly lit behavior room at least 4 hours before beginning the experiment. The test procedure was as follows: 1. 3-min exposure to the cotton tip dipped in water; 2. 45-min interval; 3. 3-min exposure to the cotton tip infused with fresh urine from female mice in the oestrus phase. The duration of female urine sniffing time was scored.

### **Sucrose preference test (SPT)**

Mice were habituated to drinking water from two bottles for one week before beginning testing. On the experimental day, water was deprived for three

hours, and then two bottles were introduced (1% sucrose and water). Mice had free choice of either drinking 1% sucrose solution or water for 2 hours after lights off during the dark cycle. Sucrose and water consumption were determined by measuring the weight changes. Sucrose preference was calculated as the ratio of the mass of sucrose consumed versus the total mass of sucrose and water consumed during the test.

### **Forced swim test (FST)**

The Plexiglas cylinder used for this test was 25 cm high and 10 cm in diameter. Each mouse was placed in a Plexiglas cylinder with water at a 15 cm depth (24°C) for 6 min, which was recorded by a camera directly above. The latency to immobility at the first 2 min and the duration of immobility during the last 4 min were measured. Immobility was defined as no movements except those that maintain their head above water for respiration.

### **Locomotor**

This test was performed in SuperFlex open field cages (40 × 40 × 30 cm, Omnitech Electronics Inc., Columbus, OH), and mice were allowed 30 min free exploration under illuminated conditions. The total distance travelled was quantified using Fusion software (Omnitech Electronics Inc., Columbus, OH).

### **Statistical analyses**

Statistical analysis was performed with graphpad prism software. Results are

presented as mean  $\pm$  standard error of mean (S.E.M.). Shapiro–Wilk test was used to test the normality and equal variance assumptions. For normally distributed data, two-tailed t tests were used to assess differences between two experimental groups with equal variance. For a two-sample comparison of means with unequal variances, two-tailed t tests with Welch’s correction were used. For non-normally distributed data, Mann–Whitney U tests were performed to compare two groups. For multiple groups, two-way ANOVAs followed by Tukey's multiple comparisons test were used.  $P < 0.05$  was considered statistically significant.

## **Data availability**

This study includes no data deposited in external repositories.

## **Acknowledgment**

This work was supported by the following grants: National Natural Science Foundation of China (81901380 and 81500930), the Natural Science Foundation of Shandong Province (ZR2017BC047 and ZR2014HQ014).

## **Author Contributions**

H.Y. and B.L. conceived this study and designed the experiments. H.Y., B.L., and M.C. wrote the manuscript. L.S., J.Y., M.C., J.W., F.S., W.W., D.W., D.L., Z.X., and C.Q. performed the experiments and analyzed the data.

## **Declaration of interests**

The authors declare no competing interests.

## **References**



Ambroggi F, Ishikawa A, Fields HL, Nicola SM (2008). Basolateral amygdala neurons facilitate reward-seeking behavior by exciting nucleus accumbens neurons. *Neuron* 59(4):648–661

Akil H, Gordon J, Hen R, Javitch J, Mayberg H, McEwen B, Meaney MJ, Nestler EJ (2018) Treatment resistant depression: A multi-scale, systems biology approach. *Neurosci Biobehav Rev* 84: 272–288

Baimel C, Lau BK, Qiao M, Borgland SL (2017) Projection-Target-Defined Effects of Orexin and Dynorphin on VTA Dopamine Neurons. *Cell Rep* 18(6): 1346–1355

Bayer HM, Glimcher PW (2005) Midbrain dopamine neurons encode a quantitative reward prediction error signal. *Neuron* 47(1):129-41

Beier KT, Steinberg EE, DeLoach KE, Xie S, Miyamichi K, Schwarz L, Gao XJ, Kremer EJ, Malenka RC, Luo L (2015) Circuit Architecture of VTA Dopamine Neurons Revealed by Systematic Input-Output Mapping. *Cell* 162(3):622–634

Björklund A, Dunnett SB (2007) Dopamine neuron systems in the brain: an update. *Trends Neurosci* 30(5):194–202

Bocklisch C, Pascoli V, Wong JC, House DR, Yvon C, de Roo M, Tan KR, Lüscher C (2013) Cocaine disinhibits dopamine neurons by potentiation of GABA transmission in the ventral tegmental area. *Science* 341(6153):1521–1525.

Brischoux F, Chakraborty S, Brierley DI, Ungless MA (2009) Phasic excitation of dopamine neurons in ventral VTA by noxious stimuli. *Proc Natl Acad Sci*

106(12): 4894–4899.

Britt JP, Benaliouad F, McDevitt RA, Stuber GD, Wise RA, Bonci A (2012) Synaptic and behavioral profile of multiple glutamatergic inputs to the nucleus accumbens. *Neuron* 76(4): 790–803

Bromberg-Martin ES, Matsumoto M, Hikosaka O (2010) Dopamine in motivational control: rewarding, aversive, and alerting. *Neuron* 68(5):815–834

Budygin EA, Park J, Bass CE, Grinevich VP, Bonin KD, Wightman RM (2012) Aversive stimulus differentially triggers subsecond dopamine release in reward regions. *Neuroscience* 201: 331–337.

Burdick KE, Braga RJ, Gopin CB, Malhotra AK (2014) Dopaminergic influences on emotional decision making in euthymic bipolar patients. *Neuropsychopharmacology* 39(2):274–282

Cao JL, Covington HE 3rd, Friedman AK, Wilkinson MB, Walsh JJ, Cooper DC, Nestler EJ, Han MH (2010) Mesolimbic dopamine neurons in the brain reward circuit mediate susceptibility to social defeat and antidepressant action. *J Neurosci* 30(49):16453–16458

Caseras X, Lawrence NS, Murphy K, Wise RG, Phillips ML (2013) Ventral striatum activity in response to reward: differences between bipolar I and II disorders. *Am J Psychiatry* 170(5):533–541

Charara A, Grace AA (2003) Dopamine receptor subtypes selectively modulate excitatory afferents from the hippocampus and amygdala to rat nucleus accumbens neurons. *Neuropsychopharmacology* 28(8):1412–1421

Chaudhury D, Walsh JJ, Friedman AK, Juarez B, Ku SM, Koo JW, Ferguson D, Tsai HC, Pomeranz L, Christoffel DJ *et al* (2013) Rapid regulation of depression-related behaviours by control of midbrain dopamine neurons. *Nature* 493(7433):532–536

Coccarello R (2019) Anhedonia in depression symptomatology: Appetite dysregulation and defective brain reward processing. *Behav Brain Res* 372:112041

Creed M, Ntamati NR, Chandra R, Lobo MK, Lüscher, C (2016) Convergence of Reinforcing and Anhedonic Cocaine Effects in the Ventral Pallidum. *Neuron* 92(1):214–226

Cryan JF, Holmes A (2005) The ascent of mouse: advances in modelling human depression and anxiety. *Nat Rev Drug Discov* 4(9): 775–790

Dandekar MP, Fenoy AJ, Carvalho AF, Soares JC, Quevedo J (2018) Deep brain stimulation for treatment-resistant depression: an integrative review of preclinical and clinical findings and translational implications. *Mol Psychiatry* 23(5):1094–1112

Dautan D, Souza AS, Huerta-Ocampo I, Valencia M, Assous M, Witten IB, Deisseroth K, Tepper JM, Bolam JP, Gerdjikov TV *et al* (2016) Segregated cholinergic transmission modulates dopamine neurons integrated in distinct functional circuits. *Nat Neurosci* 19(8):1025–1033

Davidson B, Gouveia FV, Rabin JS, Giacobbe P, Lipsman N, Hamani C (2020). Deep brain stimulation for treatment-resistant depression: current status and

future perspectives. *Expert Rev Med Devices* 17(5):371–373

Davis KL, Kahn RS, Ko G, Davidson M (1991) Dopamine in schizophrenia: a review and reconceptualization. *Am J Psychiatry* 148(11):1474–1486

de Jong JW, Afjei SA, Pollak Dorocic I, Peck JR, Liu C, Kim CK, Tian L, Deisseroth K, Lammel S (2019) A Neural Circuit Mechanism for Encoding Aversive Stimuli in the Mesolimbic Dopamine System. *Neuron* 101(1):133–151.e7

DeWilde KE, Levitch CF, Murrugh JW, Mathew SJ, Iosifescu DV (2015) The promise of ketamine for treatment-resistant depression: current evidence and future directions. *Ann N Y Acad Sci* 1345(1):47–58

Di Ciano P, Everitt BJ (2004) Direct interactions between the basolateral amygdala and nucleus accumbens core underlie cocaine-seeking behavior by rats. *J Neurosci* 24(32):7167–7173

Dobi A, Margolis EB, Wang HL, Harvey BK, Morales M (2010) Glutamatergic and nonglutamatergic neurons of the ventral tegmental area establish local synaptic contacts with dopaminergic and nondopaminergic neurons. *J Neurosci* 30(1):218–229

Dunlop BW, Nemeroff CB (2007) The role of dopamine in the pathophysiology of depression. *Arch Gen Psychiatry* 64(3):327–337

Duszkiewicz AJ, McNamara CG, Takeuchi T, Genzel L (2019) Novelty and Dopaminergic Modulation of Memory Persistence: A Tale of Two Systems. *Trends Neurosci* 42(2):102–114

Engelhard B, Finkelstein J, Cox J, Fleming W, Jang HJ, Ornelas S, Koay SA, Thiberge SY, Daw ND, Tank DW, *et al* (2019) Specialized coding of sensory, motor and cognitive variables in VTA dopamine neurons. *Nature* 570(7762): 509–513

Eshel N, Bukwich M, Rao V, Hemmelder V, Tian J, Uchida N (2015) Arithmetic and local circuitry underlying dopamine prediction errors. *Nature* 525(7568):243–246

Fabrizi C, Crisafulli C, Calati R, Albani D, Forloni G, Calabrò M, Martines R, Kasper S, Zohar J, Juven-Wetzler A *et al* (2017) Neuroplasticity and second messenger pathways in antidepressant efficacy: pharmacogenetic results from a prospective trial investigating treatment resistance. *Eur Arch Psychiatry Clin Neurosci* 267(8):723–735

Ferenczi EA, Zalocusky KA, Liston C, Grosenick L, Warden MR, Amatya D, Katovich K, Mehta H, Patenaude B, Ramakrishnan C *et al* (2016) Prefrontal cortical regulation of brainwide circuit dynamics and reward-related behavior. *Science* 351(6268):aac9698

Fields HL, Hjelmstad GO, Margolis EB, Nicola SM (2007) Ventral tegmental area neurons in learned appetitive behavior and positive reinforcement. *Annu Rev Neurosci* 30:289–316

Fogelson DL, Leuchter A (2017) Defining Treatment-Resistant Depression. *JAMA psychiatry* 74(7):758–759

French SJ, Totterdell S (2003) Individual nucleus accumbens-projection

neurons receive both basolateral amygdala and ventral subicular afferents in rats. *Neuroscience* 119(1):19–31

Garriock HA, Kraft JB, Shyn SI, Peters EJ, Yokoyama JS, Jenkins GD, Reinalda MS, Slager SL, McGrath PJ, Hamilton SP (2010) A genomewide association study of citalopram response in major depressive disorder. *Biol Psychiatry* 67(2):133–138

Gaynes BN, Lux L, Gartlehner G, Asher G, Forman-Hoffman V, Green J, Boland E, Weber RP, Randolph C, Bann C *et al* (2020) Defining treatment-resistant depression. *Depress Anxiety* 37(2):134–145

Gore F, Schwartz EC, Brangers BC, Aladi S, Stujenske JM, Likhtik E, Russo MJ, Gordon JA, Salzman CD, Axel R (2015) Neural Representations of Unconditioned Stimuli in Basolateral Amygdala Mediate Innate and Learned Responses. *Cell* 162(1):134–145

Grace AA, Bunney BS (1983) Intracellular and extracellular electrophysiology of nigral dopaminergic neurons--3. Evidence for electrotonic coupling. *Neuroscience* 10(2):333–348

Guillin O, Abi-Dargham A, Laruelle M (2007) Neurobiology of dopamine in schizophrenia. *Int Rev Neurobiol* 78:1–39

Hadpech S, Jinathep W, Saoin S, Thongkum W, Chupradit K, Yasamut U, Moonmuang S, Tayapiwatana C (2018) Impairment of a membrane-targeting protein translated from a downstream gene of a "self-cleaving" T2A peptide conjunction. *Protein Expr Purif* 150:17–25

Halbout B, Marshall AT, Azimi A, Liljeholm M, Mahler SV, Wassum KM, Ostlund SB (2019) Mesolimbic dopamine projections mediate cue-motivated reward seeking but not reward retrieval in rats. *Elife* 8:e43551

Hauser TU, Eldar E, Dolan RJ (2017) Separate mesocortical and mesolimbic pathways encode effort and reward learning signals. *Proc Natl Acad Sci* 114(35):E7395–E7404

Heymann G, Jo YS, Reichard KL, McFarland N, Chavkin C, Palmiter RD, Soden ME, Zweifel LS (2020) Synergy of Distinct Dopamine Projection Populations in Behavioral Reinforcement. *Neuron* 105(5):909–920.e5

Horowitz LF, Montmayeur JP, Echelard Y, Buck LB (1999) A genetic approach to trace neural circuits. *Proc Natl Acad Sci* 96(6):3194–3199

Howard CD, Li H, Geddes CE, Jin X (2017) Dynamic Nigrostriatal Dopamine Biases Action Selection. *Neuron* 93(6):1436–1450.e8

Hyman SE, Malenka RC (2001) Addiction and the brain: the neurobiology of compulsion and its persistence. *Nat Rev Neurosci* 2(10):695–703

Ilango A, Kesner AJ, Keller KL, Stuber GD, Bonci A, Ikemoto S (2014) Similar roles of substantia nigra and ventral tegmental dopamine neurons in reward and aversion. *J Neurosci* 34(3):817–822

Kauffling J, Girard D, Maitre M, Leste-Lasserre T, Georges F (2017) Species-specific diversity in the anatomical and physiological organisation of the BNST-VTA pathway. *Eur J Neurosci* 45(9):1230–1240

Kiening K, Sartorius A (2013) A new translational target for deep brain

stimulation to treat depression. *EMBO Mol Med* 5(8):1151-3

Kim J, Pignatelli M, Xu S, Itohara S, Tonegawa S (2016) Antagonistic negative and positive neurons of the basolateral amygdala. *Nat Neurosci* 19(12):1636–1646

Ko MY, Jang EY, Lee JY, Kim SP, Whang SH, Lee BH, Kim HY, Yang CH, Cho HJ, Gwak YS (2018) The Role of Ventral Tegmental Area Gamma-Aminobutyric Acid in Chronic Neuropathic Pain after Spinal Cord Injury in Rats. *J Neurotrauma* 35(15):1755–1764

Koob GF, Le Moal M (2001) Drug addiction, dysregulation of reward, and allostasis. *Neuropsychopharmacology* 24(2) :97–129

Krishnan V, Han MH, Graham DL, Berton O, Renthal W, Russo SJ, Laplant Q, Graham A, Lutter M, Lagace DC *et al* (2007) Molecular adaptations underlying susceptibility and resistance to social defeat in brain reward regions. *Cell* 131(2):391–404

Kumar P, Goer F, Murray L, Dillon DG, Beltzer ML, Cohen AL, Brooks NH, Pizzagalli DA (2018) Impaired reward prediction error encoding and striatal-midbrain connectivity in depression. *Neuropsychopharmacology*. 43(7):1581–1588

Lammel S, Lim BK, Ran C, Huang KW, Betley MJ, Tye KM, Deisseroth K, Malenka RC (2012) Input-specific control of reward and aversion in the ventral tegmental area. *Nature* 491(7423):212–217

Lammel S, Tye KM, Warden MR (2014) Progress in understanding mood



disorders: optogenetic dissection of neural circuits. *Genes Brain Behav* 13(1):38–51

Lavin A, Nogueira L, Lapish CC, Wightman RM, Phillips PE, Seamans JK (2005) Mesocortical dopamine neurons operate in distinct temporal domains using multimodal signaling. *J Neurosci* 25(20):5013–5023

Lebow MA, Chen A (2016) Overshadowed by the amygdala: the bed nucleus of the stria terminalis emerges as key to psychiatric disorders. *Mol Psychiatry* 21(4):450–463

LeGates TA, Kvarta MD, Tooley JR, Francis TC, Lobo MK, Creed MC, Thompson SM (2018) Reward behaviour is regulated by the strength of hippocampus-nucleus accumbens synapses. *Nature* 564(7735):258–262

Libbrecht S, Van den Haute C, Malinouskaya L, Gijssbers R, Baekelandt V (2017) Evaluation of WGA-Cre-dependent topological transgene expression in the rodent brain. *Brain Struct Funct* 222(2):717–733

Lintas A, Chi N, Lauzon NM, Bishop SF, Gholizadeh S, Sun N, Tan H, Laviolette SR (2011) Identification of a dopamine receptor-mediated opiate reward memory switch in the basolateral amygdala-nucleus accumbens circuit. *J Neurosci* 31(31):11172–11183.

Liu D, Tang QQ, Yin C, Song Y, Liu Y, Yang JX, Liu H, Zhang YM, Wu SY, Song Y *et al* (2018) Brain-derived neurotrophic factor-mediated projection-specific regulation of depressive-like and nociceptive behaviors in the mesolimbic reward circuitry. *Pain* 159(1):175

Liu MY, Yin CY, Zhu LJ, Zhu XH, Xu C, Luo CX, Chen H, Zhu DY, Zhou QG (2018) Sucrose preference test for measurement of stress-induced anhedonia in mice. *Nat Protoc* 13(7):1686–1698

Lohani S, Martig AK, Underhill SM, DeFrancesco A, Roberts MJ, Rinaman L, Amara S, Moghaddam B (2018) Burst activation of dopamine neurons produces prolonged post-burst availability of actively released dopamine. *Neuropsychopharmacology* 43(10):2083–2092

Loureiro M, Lüscher C (2018) An unusual suspect in cocaine addiction. *EMBO Rep* 19(9):e46743

Luo YJ, Li YD, Wang L, Yang SR, Yuan XS, Wang J, Cherasse Y, Lazarus M, Chen JF, Qu WM *et al* (2018) Nucleus accumbens controls wakefulness by a subpopulation of neurons expressing dopamine D1 receptors. *Nat Commun* 9(1):1576

Lüscher C (2016) The Emergence of a Circuit Model for Addiction. *Annu Rev Neurosci* 39:257–276.

MacAskill AF, Little JP, Cassel JM, Carter AG (2012) Subcellular connectivity underlies pathway-specific signaling in the nucleus accumbens. *Nat Neurosci* 15(12):1624–1626.

Mahler SV, Vazey EM, Beckley JT, Keistler CR, McGlinchey EM, Kaufling J, Wilson SP, Deisseroth K, Woodward JJ, Aston-Jones G (2014) Designer receptors show role for ventral pallidum input to ventral tegmental area in cocaine seeking. *Nat Neurosci* 17(4):577–585

Maldonado-Irizarry CS, Swanson CJ, Kelley AE (1995) Glutamate receptors in the nucleus accumbens shell control feeding behavior via the lateral hypothalamus. *J Neurosci* 15(10): 6779–6788

Malkesman O, Scattoni ML, Paredes D, Tragon T, Pearson B, Shaltiel G, Chen G, Crawley JN, Manji HK (2010) The female urine sniffing test: a novel approach for assessing reward-seeking behavior in rodents. *Biol Psychiatry* 67(9):864–871

Margolis EB, Lock H, Hjelmstad GO, Fields HL (2006) The ventral tegmental area revisited: is there an electrophysiological marker for dopaminergic neurons? *J Physiol* 577(Pt 3):907–924

Martínez-Rivera A, Hao J, Tropea TF, Giordano TP, Kosovsky M, Rice RC, Lee A, Huganir RL, Striessnig J, Addy NA *et al* (2017) Enhancing VTA Cav1.3 L-type Ca<sup>2+</sup> channel activity promotes cocaine and mood-related behaviors via overlapping AMPA receptor mechanisms in the nucleus accumbens. *Mol Psychiatry* 22(12):1735–1745

Matsui A, Williams JT (2011) Opioid-sensitive GABA inputs from rostromedial tegmental nucleus synapse onto midbrain dopamine neurons. *J Neurosci* 31(48):17729–17735

Matsui A, Jarvie BC, Robinson BG, Hentges ST, Williams JT (2014) Separate GABA afferents to dopamine neurons mediate acute action of opioids, development of tolerance, and expression of withdrawal. *Neuron* 82(6):1346–1356

Matsumoto M, Hikosaka O (2009) Two types of dopamine neuron distinctly convey positive and negative motivational signals. *Nature* 459(7248):837–841

Mayberg HS, Lozano AM, Voon V, McNeely HE, Seminowicz D, Hamani C, Schwalb JM, Kennedy SH (2005) Deep brain stimulation for treatment-resistant depression. *Neuron* 45(5):651–660

McLaughlin I, Dani JA, De Biasi M (2017) The medial habenula and interpeduncular nucleus circuitry is critical in addiction, anxiety, and mood regulation. *J Neurochem* 142 Suppl 2(Suppl 2):130–143

McMakin DL, Olino TM, Porta G, Dietz LJ, Emslie G, Clarke G, Wagner KD, Asarnow JR, Ryan ND, Birmaher B *et al* (2012) Anhedonia predicts poorer recovery among youth with selective serotonin reuptake inhibitor treatment-resistant depression. *J Am Acad Child Adolesc Psychiatry* 51(4):404–411

Mohebi A, Pettibone JR, Hamid AA, Wong JT, Vinson LT, Patriarchi T, Tian L, Kennedy RT, Berke JD (2019) Dissociable dopamine dynamics for learning and motivation. *Nature* 570(7759):65–70

Morales M, Margolis EB (2017) Ventral tegmental area: cellular heterogeneity, connectivity and behaviour. *Nat Rev Neurosci* 18(2):73–85

Morilak DA, Frazer A (2004) Antidepressants and brain monoaminergic systems: a dimensional approach to understanding their behavioural effects in depression and anxiety disorders. *Int J Neuropsychopharmacol* 7(2):193–218

Nair-Roberts RG, Chatelain-Badie SD, Benson E, White-Cooper H, Bolam JP,

Ungless MA (2008) Stereological estimates of dopaminergic, GABAergic and glutamatergic neurons in the ventral tegmental area, substantia nigra and retrorubral field in the rat. *Neuroscience* 152(4):1024–1031

Nestler EJ, Barrot M, DiLeone RJ, Eisch AJ, Gold SJ, Monteggia LM (2002) Neurobiology of depression. *Neuron* 34(1):13-25

Nestler EJ, Carlezon WA Jr (2006) The mesolimbic dopamine reward circuit in depression. *Biol Psychiatry* 59(12):1151–1159

Nestler EJ (2015) Role of the Brain's Reward Circuitry in Depression: Transcriptional Mechanisms. *Int Rev Neurobiol* 124:151–170

Nestler EJ, Lüscher C (2019) The Molecular Basis of Drug Addiction: Linking Epigenetic to Synaptic and Circuit Mechanisms. *Neuron* 102(1):48–59

Ostlund SB, LeBlanc KH, Kosheleff AR, Wassum KM, Maidment NT (2014) Phasic mesolimbic dopamine signaling encodes the facilitation of incentive motivation produced by repeated cocaine exposure. *Neuropsychopharmacology* 39(10):2441–2449

Ostroumov A, Thomas AM, Kimmey BA, Karsch JS, Doyon WM, Dani JA (2016) Stress Increases Ethanol Self-Administration via a Shift toward Excitatory GABA Signaling in the Ventral Tegmental Area. *Neuron* 92(2):493–504

Pascoli V, Terrier J, Hiver A, Lüscher C (2015) Sufficiency of Mesolimbic Dopamine Neuron Stimulation for the Progression to Addiction. *Neuron* 88(5):1054–1066

Pessiglione M, Seymour B, Flandin G, Dolan RJ, Frith CD (2006)

Dopamine-dependent prediction errors underpin reward-seeking behaviour in humans. *Nature* 442(7106):1042–1045

Pignatelli M, Bonci A (2015). Role of Dopamine Neurons in Reward and Aversion: A Synaptic Plasticity Perspective. *Neuron* 86(5):1145–1157

Pignatelli M, Bonci A (2018). Spiraling Connectivity of NAc-VTA Circuitry. *Neuron* 97(2):261–262

Pizzagalli DA, Holmes AJ, Dillon DG, Goetz EL, Birk JL, Bogdan R, Dougherty DD, Iosifescu DV, Rauch SL, Fava M (2009) Reduced caudate and nucleus accumbens response to rewards in unmedicated individuals with major depressive disorder. *Am J Psychiatry* 166(6):702–710

Polter AM, Barcomb K, Tsuda AC, Kauer JA (2018) Synaptic function and plasticity in identified inhibitory inputs onto VTA dopamine neurons. *Eur J Neurosci* 47(10):1208–1218

Popescu AT, Zhou MR, Poo MM (2016) Phasic dopamine release in the medial prefrontal cortex enhances stimulus discrimination. *Proc Natl Acad Sci* 113(22):E3169–E3176

Ramirez S, Liu X, MacDonald CJ, Moffa A, Zhou J, Redondo RL, Tonegawa S (2015) Activating positive memory engrams suppresses depression-like behaviour. *Nature* 522(7556):335–339

Rappaport BI, Kandala S, Luby JL, Barch DM (2020) Brain Reward System Dysfunction in Adolescence: Current, Cumulative, and Developmental Periods

of Depression. *Am J Psychiatry* 177(8):754–763

Ressler KJ, Nemeroff CB (2000) Role of serotonergic and noradrenergic systems in the pathophysiology of depression and anxiety disorders. *Depress Anxiety* 12 Suppl 1:2–19

Rinker JA, Marshall SA, Mazzone CM, Lowery-Gionta EG, Gulati V, Pleil KE, Kash TL, Navarro M, Thiele TE (2017) Extended Amygdala to Ventral Tegmental Area Corticotropin-Releasing Factor Circuit Controls Binge Ethanol Intake. *Biol Psychiatry* 81(11):930–940

Rizvi SJ, Pizzagalli DA, Sproule BA, Kennedy SH (2016) Assessing anhedonia in depression: Potentials and pitfalls. *Neurosci Biobehav Rev* 65:21–35

Russo SJ, Nestler EJ (2013) The brain reward circuitry in mood disorders. *Nat Rev Neurosci* 14(9):609–625.

Sackeim HA (2001) The definition and meaning of treatment-resistant depression. *J Clin Psychiatry* 62 Suppl 16:10–17

Saddoris MP, Cacciapaglia F, Wightman RM, Carelli RM (2015) Differential Dopamine Release Dynamics in the Nucleus Accumbens Core and Shell Reveal Complementary Signals for Error Prediction and Incentive Motivation. *J Neurosci* 35(33):11572–11582

Schultz W (2006) Behavioral theories and the neurophysiology of reward. *Annu Rev Psychol* 57:87–115

Sesack SR, Grace AA (2010) Cortico-Basal Ganglia reward network: microcircuitry. *Neuropsychopharmacology* 35(1):27–47

Setlow B, Holland PC, Gallagher M (2002) Disconnection of the basolateral amygdala complex and nucleus accumbens impairs appetitive pavlovian second-order conditioned responses. *Behav Neurosci* 116(2):267–275

Simmons DV, Petko AK, Paladini CA (2017) Differential expression of long-term potentiation among identified inhibitory inputs to dopamine neurons. *J Neurophysiol* 118(4):1998–2008

Soares-Cunha C, Coimbra B, David-Pereira A, Borges S, Pinto L, Costa P, Sousa N, Rodrigues AJ (2016) Activation of D2 dopamine receptor-expressing neurons in the nucleus accumbens increases motivation. *Nat Commun* 7:11829

Stachniak TJ, Ghosh A, Sternson SM (2014) Chemogenetic synaptic silencing of neural circuits localizes a hypothalamus→midbrain pathway for feeding behavior. *Neuron* 82(4):797–808

Stamatakis AM, Sparta DR, Jennings JH, McElligott ZA, Decot H, Stuber GD (2014) Amygdala and bed nucleus of the stria terminalis circuitry: Implications for addiction-related behaviors. *Neuropharmacology* 76 Pt B(0 0):320–328

Steffensen SC, Svingos AL, Pickel VM, Henriksen SJ (1998) Electrophysiological characterization of GABAergic neurons in the ventral tegmental area. *J Neurosci* 18(19):8003–8015

Strauss GP, Gold JM (2012) A new perspective on anhedonia in schizophrenia. *Am J Psychiatry* 169(4):364–373

Stuber GD, Sparta DR, Stamatakis AM, van Leeuwen WA, Hardjoprajitno JE,



Cho S, Tye KM, Kempadoo KA, Zhang F, Deisseroth K *et al* (2011) Excitatory transmission from the amygdala to nucleus accumbens facilitates reward seeking. *Nature* 475(7356):377–380

Tan KR, Yvon C, Turiault M, Mirzabekov JJ, Doehner J, Labouèbe G, Deisseroth K, Tye KM, Lüscher C (2012) GABA neurons of the VTA drive conditioned place aversion. *Neuron* 73(6):1173–1183

Tervo DG, Hwang BY, Viswanathan S, Gaj T, Lavzin M, Ritola KD, Lindo S, Michael S, Kuleshova E, Ojala D *et al* (2016) A Designer AAV Variant Permits Efficient Retrograde Access to Projection Neurons. *Neuron* 92(2):372–382

Ungless MA, Magill PJ, Bolam JP (2004) Uniform inhibition of dopamine neurons in the ventral tegmental area by aversive stimuli. *Science* 303(5666):2040–2042

Ungless MA, Grace AA (2012) Are you or aren't you? Challenges associated with physiologically identifying dopamine neurons. *Trends Neurosci* 35(7):422–430

van Zessen R, Phillips JL, Budygin EA, Stuber GD (2012) Activation of VTA GABA neurons disrupts reward consumption. *Neuron* 73(6):1184–1194

Vong L, Ye C, Yang Z, Choi B, Chua S Jr, Lowell BB (2011) Leptin action on GABAergic neurons prevents obesity and reduces inhibitory tone to POMC neurons. *Neuron* 71(1):142–154

Vrieze E, Pizzagalli DA, Demyttenaere K, Hompes T, Sienaert P, de Boer P, Schmidt M, Claes S (2013) Reduced reward learning predicts outcome in

major depressive disorder. *Biol Psychiatry* 73(7):639–645

Wassum KM, Ostlund SB, Loewinger GC, Maidment NT (2013) Phasic mesolimbic dopamine release tracks reward seeking during expression of Pavlovian-to-instrumental transfer. *Biol Psychiatry* 73(8): 747–755

Wassum KM, Izquierdo A (2015) The basolateral amygdala in reward learning and addiction. *Neurosci Biobehav Rev* 57:271–283

Watabe-Uchida M, Eshel N, Uchida N (2017) Neural Circuitry of Reward Prediction Error. *Annu Rev Neurosci* 40:373–394

Wickersham IR, Lyon DC, Barnard RJ, Mori T, Finke S, Conzelmann KK, Young JA, Callaway EM (2007) Monosynaptic restriction of transsynaptic tracing from single, genetically targeted neurons. *Neuron* 53(5):639–647

Willuhn I, Wanat MJ, Clark JJ, Phillips PE (2010) Dopamine signaling in the nucleus accumbens of animals self-administering drugs of abuse. *Curr Top Behav Neurosci* 3:29–71

Wittmann BC, Schott BH, Guderian S, Frey JU, Heinze HJ, Düzel E (2005) Reward-related fMRI activation of dopaminergic midbrain is associated with enhanced hippocampus-dependent long-term memory formation. *Neuron* 45(3):459–467

Yoshihara Y, Mizuno T, Nakahira M, Kawasaki M, Watanabe Y, Kagamiyama H, Jishage K, Ueda O, Suzuki H, Tabuchi K *et al* (1999) A genetic approach to visualization of multisynaptic neural pathways using plant lectin transgene. *Neuron* 22(1):33–41

Yuan L, Dou YN, Sun YG (2019) Topography of Reward and Aversion Encoding in the Mesolimbic Dopaminergic System. *J Neurosci* 39(33):6472–6481

Zhang X, Kim J, Tonegawa S (2020) Amygdala Reward Neurons Form and Store Fear Extinction Memory. *Neuron* 105(6):1077–1093.e7

Zhou Z, Liu X, Chen S, Zhang Z, Liu Y, Montardy Q, Tang Y, Wei P, Liu N, Li L et al (2019) A VTA GABAergic Neural Circuit Mediates Visually Evoked Innate Defensive Responses. *Neuron* 103(3):473–488.e6

## Figure legends

**Figure 1- Positive experience increases c-Fos expression in basolateral amygdala , nucleus accumbens and ventral tegmental area.**

Whole brain c-Fos staining shows that positive experience (A'-E'), but not neutral experience (A-E), elicits increase of c-Fos expression in basolateral amygdala (BLA) (A, A'), nucleus accumbens (NAc) (B, B'), ventral tegmental area (VTA) (D, D'), but not in the medial prefrontal cortex (mPFC, including prelimbic (PrL) and infralimbic (IL)) (C, C'), substantia nigra (SN) (D, D'), interpeduncular nucleus (IPN) (D, D') or dentate gyrus (DG) (E, E'). Statistical analysis of the histological data revealed a significant increase of c-Fos expression in basolateral amygdala (F, two-tailed unpaired t test,  $t_{(12)} = 2.993$ ,  $P = 0.0112$ ), nucleus accumbens (G, two-tailed unpaired t test with Welch's correction,  $t_{(7.109)} = 2.747$ ,  $P = 0.0282$ ) and ventral tegmental area (I,

two-tailed unpaired t test with Welch's correction ,  $t_{(6.687)} = 3.788$ ,  $P = 0.0074$ ).

Neutral experience group  $n=7$ ; positive experience group  $n=7$ . \* $P<0.05$ , \*\* $P<0.01$ . Data are presented as means  $\pm$  SEM. Annotation (AP): distance from the bregma (mm). Scale bars correspond to 100 $\mu$ m.

## **Figure 2- Positive experience activates the VTA-BLA-NAc circuit.**

(A) The experimental timeline. Intraperitoneal injection of 4-OHT induced hM3D-mCherry labeling in activated cells during neutral experience (B) or positive experience (B') in the VTA, SN and IPN of Fos-CreERT2 mice. Intraperitoneal injection of clozapine-N-oxide (CNO) activated c-Fos expression in hM3D-mCherry-labeled neurons (neutral experience group, C and D; positive experience group, C' and D'). C-Fos expression in BLA (E, E'), NAc (F, F'), mPFC (G, G') and DG (H, H') after reactivating hM3D-mCherry-labeled VTA neurons. Statistical analysis of the histological data revealed that positive experience induced more hM3D-mCherry-labeled VTA neurons compared with neutral experience (I, two-tailed unpaired t test with Welch's correction,  $t_{(4.607)} = 5.852$ ,  $P = 0.0027$ ), and that the c-Fos positive VTA cells of positive experience group after CNO injection were more than those of neutral experience group (I', Mann-Whitney U test,  $P=0.0079$ ) although most VTA cells were hM3D-mCherry-labeled in both groups (I'', neutral  $81.53\pm 5.510\%$ , positive  $86.41\pm 1.888\%$ ). Few cells were labelled with hM3D-mCherry (B, B') and only a small number of cells were c-Fos-positive after CNO injection (C, C') in SN and IPN in both groups. Statistical analysis

revealed no significant difference in the number of c-Fos-positive cells in SN (J) and IPN (K) between neutral and positive experience groups. The number of c-Fos-positive cells after clozapine-N-oxide injection was significantly different in BLA (L, two-tailed unpaired t test with Welch's correction,  $t_{(4.159)} = 5.265$ ,  $P = 0.0056$ ) and NAc (M, two-tailed unpaired t test with Welch's correction,  $t_{(4.461)} = 2.870$ ,  $P = 0.04$ ) between neutral and positive experience groups, but not in mPFC (N, Mann-Whitney U test,  $P=0.5476$ ) and DG (O, two-tailed unpaired t test,  $t_{(8)} = 0.8750$ ,  $P = 0.4071$ ). Neutral experience group:  $n=5$ ; positive experience group:  $n=5$ . (P) Diagram illustrating virus injection in target areas. (Q) Representative coronal slice showing the expression of AAV-hSyn-WGA-Cre-T2A-ZsGreen (green) 3 weeks after virus injection into the VTA. (R) Representative coronal slice showing the expression of AAV-CAG-DIO-mCherry (red) 3 weeks after virus injection into the BLA. (S) Representative coronal slice showing the strong mCherry-positive (red) fibers in NAc 3 weeks after virus injection into the BLA. (T) Diagram illustrating virus injection in target areas and subsequent positive experience. (U) Representative image showing the injection sites in the NAc. Representative images showing the expression of GFP (V) and c-Fos (V') in BLA. (V'') Representative image showing c-Fos expression in BLA merged with GFP. (W) Statistical analysis showing the percentage of c-Fos positive BLA neurons that were also GFP labeled ( $69.81 \pm 1.731\%$ ,  $n=4$ ). Representative images showing the expression of GFP (X) and c-Fos staining (X') in NAc. (X'') Representative

merged images. (N) Statistical analysis showing the percentage of c-Fos positive VTA neurons that were also GFP labeled ( $14.25 \pm 3.080\%$ ,  $n=4$ ). \* $P < 0.05$ , \*\* $P < 0.01$ . Data are presented as means  $\pm$  SEM. Annotation (AP): distance from the bregma (mm). Scale bars correspond to  $100\mu\text{m}$ .

**Figure 3- Blockade of VTA-BLA-NAc circuit responding to positive experience induces depressive-like behaviors.**

(A) Diagram illustrating virus injection in target areas and subsequent experiments. Blocking the projections from VTA to BLA induced depressive-like behaviors, as evaluated by female urine sniffing test (B, Mann-Whitney U test,  $P=0.0030$ ) and sucrose preference test (C, two-tailed unpaired t test with Welch's correction,  $t_{(11.73)}=3.584$ ,  $P = 0.0039$ ), but did not influence the locomotor activity (D, two-tailed unpaired t test,  $t_{(16)} = 1.088$ ,  $P = 0.2927$ ). mCherry group:  $n=8$ , hm4D group:  $n=10$  in FUST(B), SPT(C) and Locomotor (D). (E) Diagram illustrating virus injection in target areas and subsequent experiments. Blocking the projections from BLA to NAc decreased the sniff time (F, two-tailed unpaired t test,  $t_{(17)} = 2.627$ ,  $P = 0.0176$ ) and sucrose preference (G, two-tailed unpaired t test with Welch's correction,  $t_{(11.41)}=3.024$ ,  $P = 0.0111$ ), but did not influence the locomotor activity (H, two-tailed unpaired t test,  $t_{(17)} = 1.088$ ,  $P = 0.2164$ ). mCherry: group  $n=9$ , hm4D group:  $n=10$  in FUST(F), SPT(G) and Locomotor (H). \* $P < 0.05$ , \*\* $P < 0.01$ . Data are presented as means  $\pm$  SEM.

**Figure 4- Reactivation of VTA neurons labelled by hm3D during previous**

**positive experience can ameliorate depressive-like behaviors induced by chronic restraint stress.**

(A) The experimental timeline. (B) Sucrose preference test showing reactivation of hm3D-labeled VTA neurons during previous positive experience by CNO increased sucrose preference under chronic stress condition (subgroups,  $F(1, 19)=9.634$ ,  $P=0.0058$ ; treatment,  $F(2, 38)=53.53$ ,  $P < 0.001$ ; subgroups X treatment,  $F(2, 38)=17.30$ ,  $P<0.001$ ; Neutral VS. Positive, Basal  $P>0.999$ , Basal-CNO  $P=0.9997$ , Restraint-CNO  $P<0.0001$ ).

(C) FUST showing reactivation of hm3D-labeled VTA neurons during previous positive experience by CNO increased sniff time under chronic stress condition (subgroups,  $F(1, 21)=37.54$ ,  $P < 0.001$ ; treatment,  $F(2,42)=32.22$ ,  $P<0.001$ ; subgroups X treatment,  $F(2, 42)=7.818$ ,  $P=0.0013$ ; Neutral VS. Positive, Basal  $P=0.9989$ , Basal-CNO  $P<0.0001$ , Restraint-CNO  $P=0.0002$ ).

(D) Forced swim test (FST) showing reactivation of hm3D-labeled VTA neurons during previous positive experience by CNO decreased the immobility time (left, two-tailed unpaired t test,  $t_{(21)} = 2.911$ ,  $P = 0.0083$ ), but did not influence the latency time (right, Mann-Whitney U test,  $P=0.9878$ ), under chronic stress condition. (E) Sucrose preference test showing reactivation of hm3D-labeled VTA neurons during previous positive experience by CNO increased sucrose preference (two-tailed unpaired t test,  $t_{(21)} = 0.6287$ ,  $P = 0.5364$ ) under chronic stress condition. Neutral experience group  $n=10$ , positive experience group  $n=11$  in SPT (B); Neutral experience

group n=11, positive experience group n=12 in FUST (C), FST (D) and locomotor (E). \*\*P<0.01, \*\*\*P<0.001. Data are presented as means +/- SEM.

**Figure 5- The activated VTA neurons during positive experience are mostly dopaminergic.**

(A) Schematic of the breeding strategy used to generate mice expressing tdTomato specifically in dopaminergic neurons (DAT-IRES-Cre; Ai14). Representative images showing the expression of tdTomato (B, E) and TH staining (C, F) in VTA. (D, G) Images are merged. (H) Statistical analysis showing the percentage of tdTomato-labeled VTA neurons positive also for TH ( $97.64 \pm 0.7862\%$ , n=4). (I) Schematic showing the experimental procedure for DAT-IRES-Cre;Ai14 mice subject to positive experience and subsequent c-Fos staining. (J) Representative image showing the expression of tdTomato in VTA. (K) Representative image showing the expression of c-Fos in VTA. (L) Images of J and K are merged. (M) Statistical analysis showing the percentage of tdTomato-labeled c-Fos-positive VTA neurons ( $68.92 \pm 4.902\%$ , n=5). (N) Diagram showing the experimental procedure and representative image demonstrating the electrode track through the VTA. (O) Positive experience increased the number of spontaneously active dopaminergic neurons per track in the VTA (Mann-Whitney U test, P=0.0061; Neutral n=9 mice, Positive n=8 mice). (P) Left, representative extracellular voltage traces from VTA dopaminergic neurons; Right, statistical result showing the average firing rate of the spontaneously active dopaminergic neurons (two-tailed unpaired t test,



$t_{(100)} = 1.710$ ,  $P=0.0904$ ; Neutral  $n=9$  mice (42 neurons), Positive  $n=8$  mice (60 neurons)). (Q) Left, representative extracellular voltage traces showing the burst firing of VTA dopaminergic neurons; Right, statistical result showing the average percentage of burst firing of the active dopaminergic neurons (Mann-Whitney U test,  $P=0.0447$ ; Neutral  $n=9$  mice (42 neurons); Positive  $n=8$  mice (60 neurons)). \* $P<0.05$ , \*\* $P<0.01$ . Data are presented as means  $\pm$  SEM. Annotation (AP): distance from the bregma (mm). Scale bars correspond to  $100\mu\text{m}$ .

**Figure 6- Positive and negative experiences activate distinct VTA neuron subpopulations.**

(A) Schematic showing the experimental procedure for C57BL/6J mice subject to restraint stress and subsequent c-Fos staining. Representative images showing c-Fos expression in BLA (B and C), NAc (E and F) and VTA (H and I). Statistical analysis showing restraint stress increased c-Fos expression in BLA (D, two-tailed unpaired t test,  $t_{(10)} = 3.989$ ,  $P = 0.0026$ ), NAc (G, two-tailed unpaired t test,  $t_{(10)} = 12.23$ ,  $P < 0.001$ ) and VTA (J, two-tailed unpaired t test with Welch's correction,  $t_{(5.610)} = 13.69$ ,  $P < 0.001$ ). (K) Schematic showing the experimental procedure for DAT-IRES-Cre;Ai14 mice subject to restraint stress and subsequent c-Fos staining. Representative images showing the tdTomato (L) and c-Fos (M) expression in VTA. (N) Images of L and M are merged. (O) Statistical analysis showing the percentage of c-Fos-positive VTA neurons that were labeled by tdTomato ( $17.04 \pm 3.513\%$ ,  $n=4$ ). (P) Diagram illustrating virus

injection in target areas and subsequent experiments. Representative images showing the GFP (Q) and c-Fos (R) expression in VTA. (S) Images of Q and R are merged. (T) Statistical analysis showing the percentage of c-Fos-positive VTA neurons that were labeled by GFP ( $3.765 \pm 1.285\%$ ,  $n=5$ ). (U) Schematic showing the experimental procedure for Fos-CreER<sup>T2</sup>; Ai14 mice. Representative images showing the tdTomato (V) and c-Fos (W) expression in VTA. (X) Images of V and W are merged. (Y) Statistical analysis showing the percentage of c-Fos-positive VTA neurons that were labeled by tdTomato ( $3.098 \pm 1.412\%$ ,  $n=5$ ). \*\*\* $P < 0.001$ . Data are presented as means  $\pm$  SEM. Annotation (AP): distance from the bregma (mm). Scale bars correspond to 100 $\mu$ m.

**Figure 7- The VTA GABAergic neurons activated by restraint stress inhibit local VTA DA neurons responding to positive experience.**

(A) Diagram illustrating virus injection in target areas and subsequent experiments. Representative images showing the expression of mCherry (B, E) and c-Fos staining (C, F) in VTA. (D, G) Images are merged. (H) Statistical analysis showing the percentage of mCherry -labeled VTA neurons positive also for c-Fos ( $79.49 \pm 3.652\%$ ,  $n=5$ ). (I) Schematic showing the experimental procedure for C57BL/6J mice subject to restraint stress and subsequent in vivo extracellular recording. (J) Restraint stress increased the number of spontaneously active GABA neurons per track in the VTA (two-tailed unpaired t test,  $t_{(13)} = 4.461$ ,  $P=0.0006$ ; Control  $n=7$  mice, Restraint

n=8 mice). (K) Left, representative extracellular voltage traces from VTA GABAergic neurons; Right, statistical result showing the average firing rate of the active GABAergic neurons (Mann-Whitney U test,  $P=0.8192$ ; Control n=7 mice (13 neurons), Restraint n=8 mice (31 neurons)). (L) Diagram illustrating virus injection in target areas and subsequent experiments. Reactivation of VTA neurons previously activated by restraint stress inhibited the responsiveness of VTA dopaminergic neurons to sexual reward, decreasing the number of spontaneously active dopaminergic neurons per track in the VTA (M, two-tailed unpaired t test,  $t_{(11)} = 5.299$ ,  $P=0.0003$ ; mCherry n=6 mice, hM3D n=7 mice) and the percentage of burst firing (O, Mann-Whitney U test,  $P=0.0350$ ; mCherry n=6 (40 neurons), hM3D n=7 mice (22 neurons)), but no change in the firing rate (N, Mann-Whitney U test,  $P=0.2281$ ; mCherry n=6 (40 neurons), hM3D n=7 mice (22 neurons)). \* $P<0.05$ , \*\*\* $P<0.001$ . Data are presented as means  $\pm$  SEM. Annotation (AP): distance from the bregma (mm). Scale bars correspond to  $100\mu\text{m}$ .

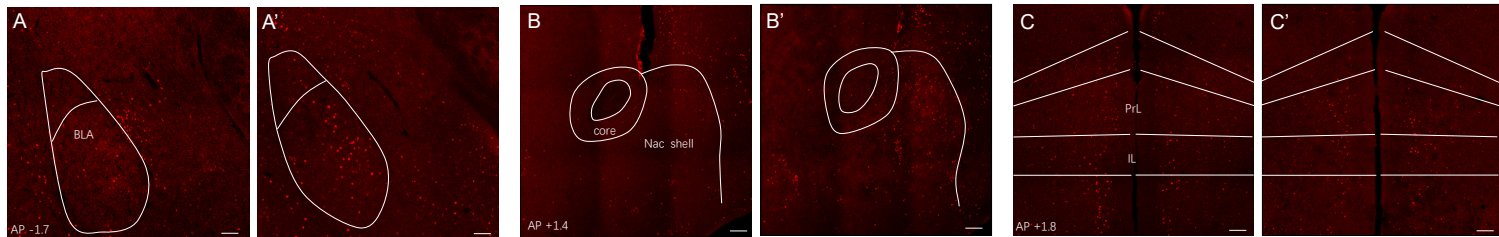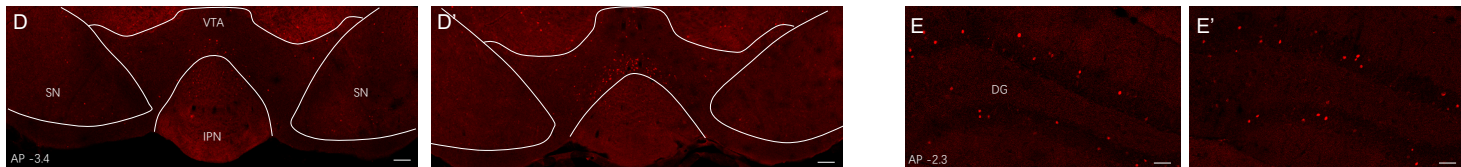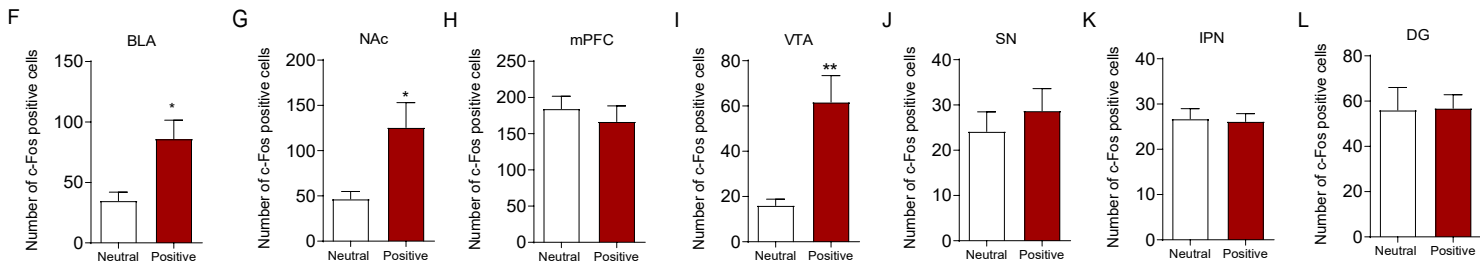

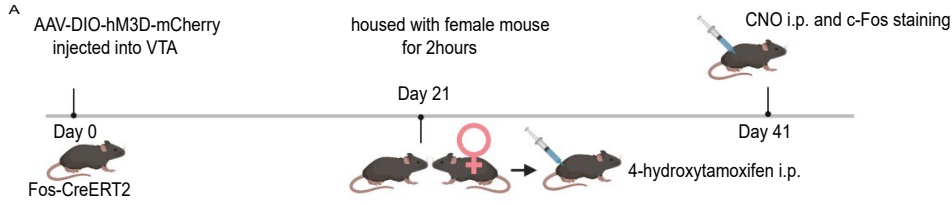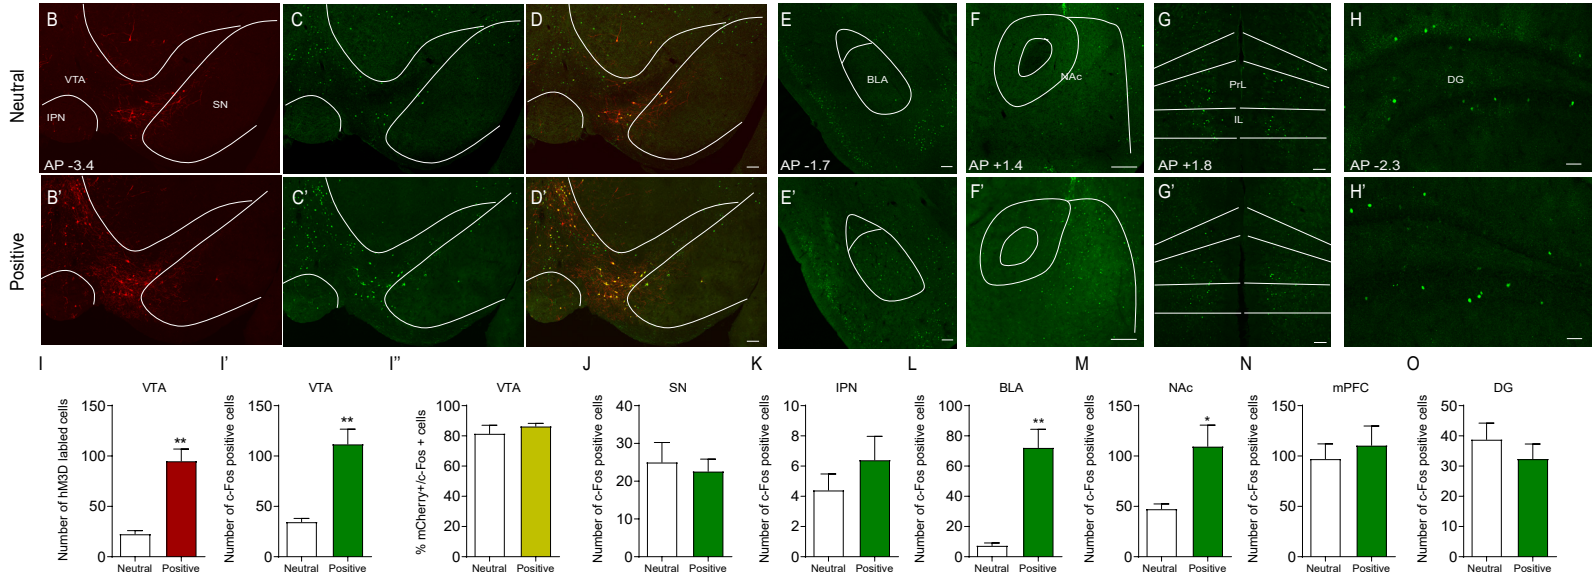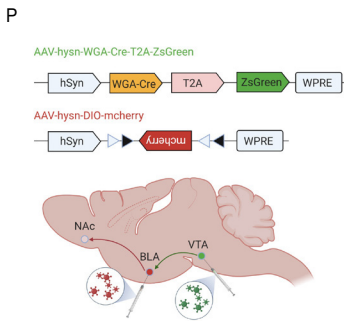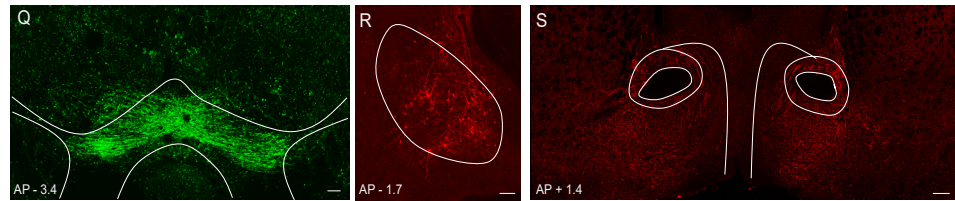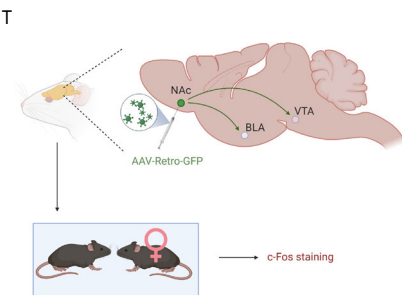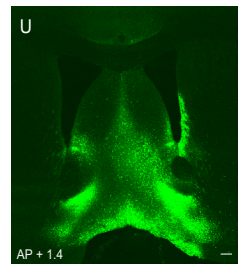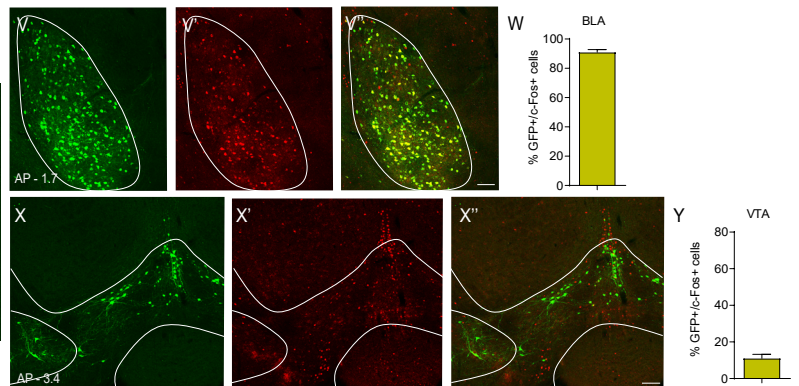

**A**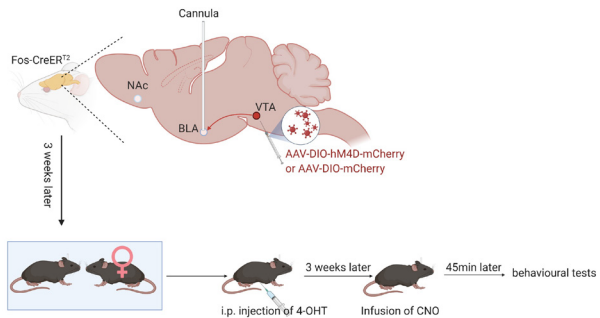**B**

Female urine sniffing test

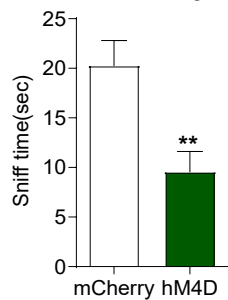**C**

Sucrose preference test

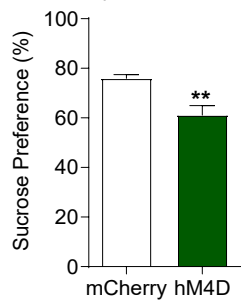**D**

Locomotor

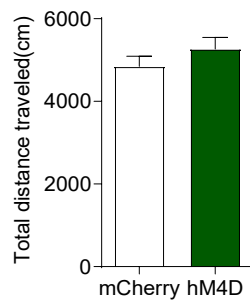**E**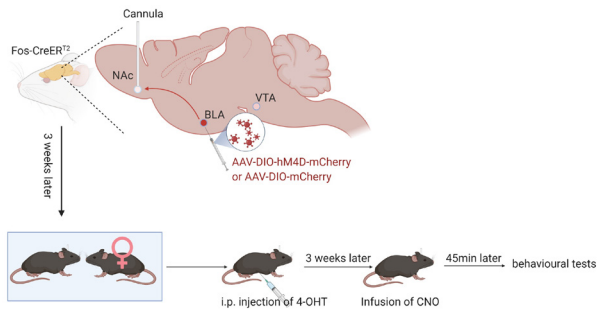**F**

Female urine sniffing test

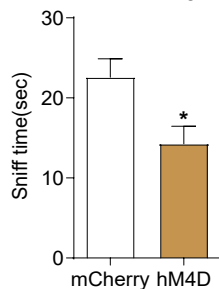**G**

Sucrose preference test

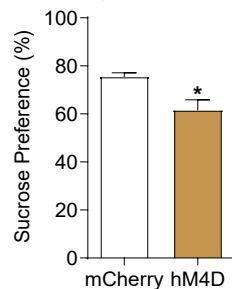**H**

Locomotor

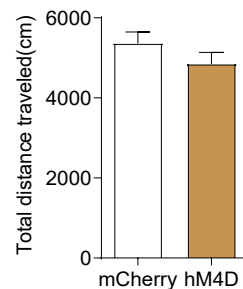

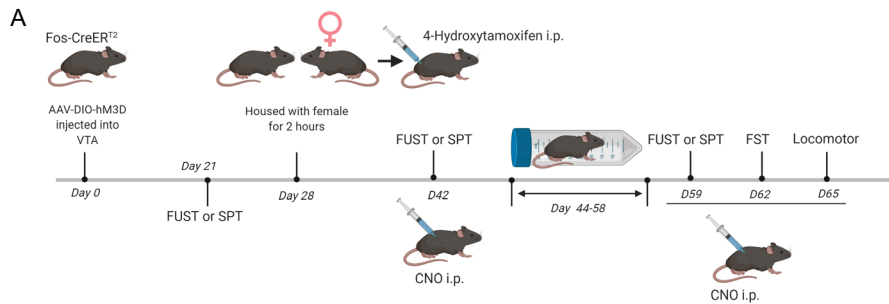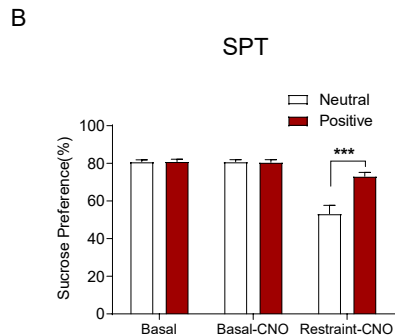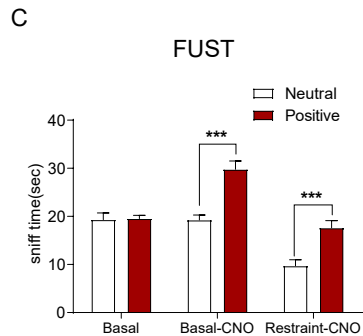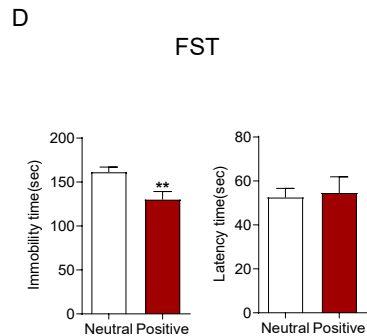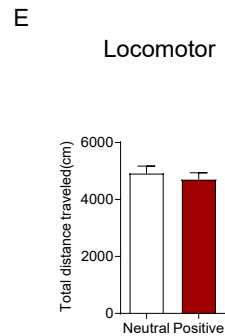

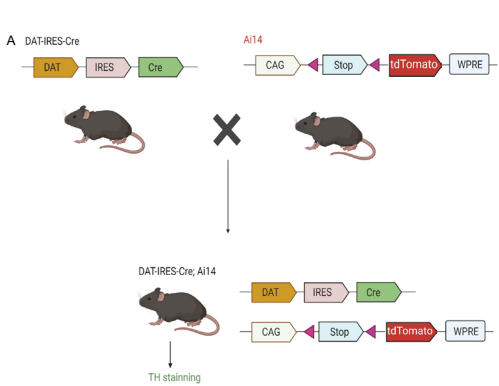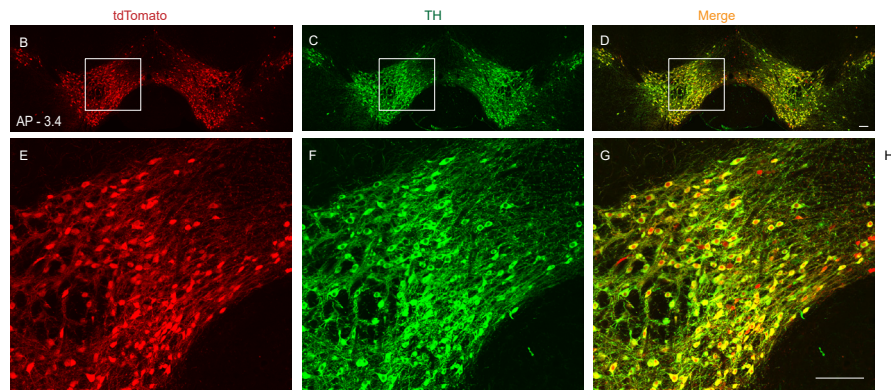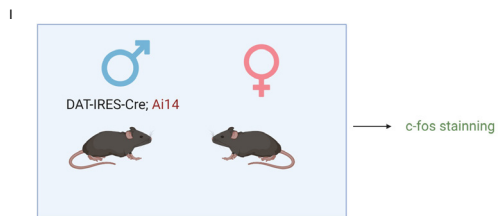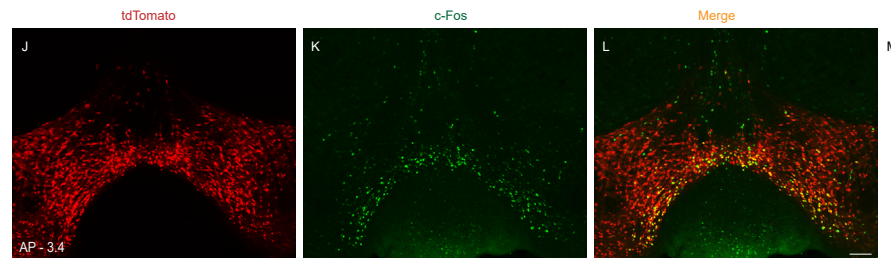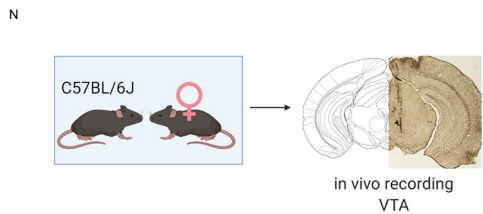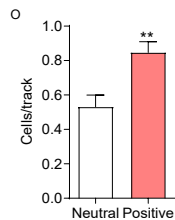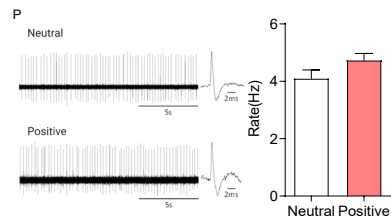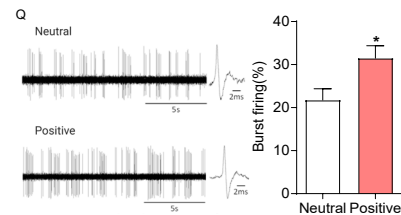



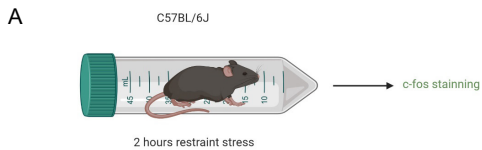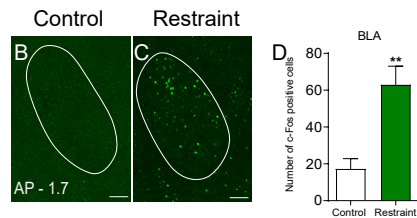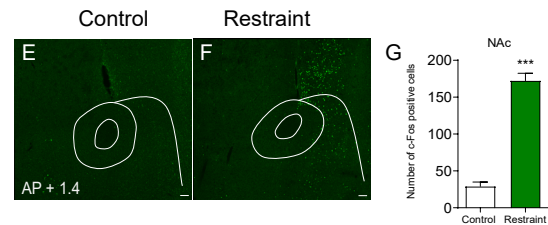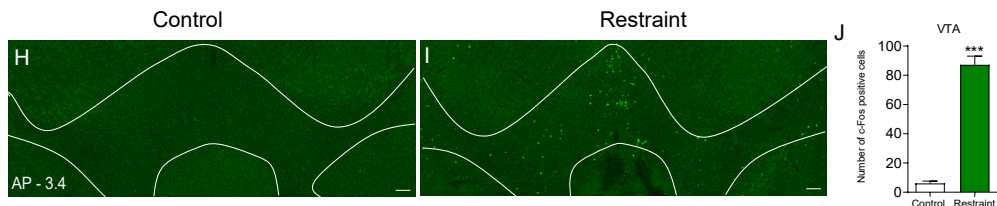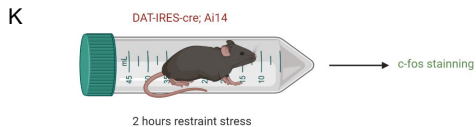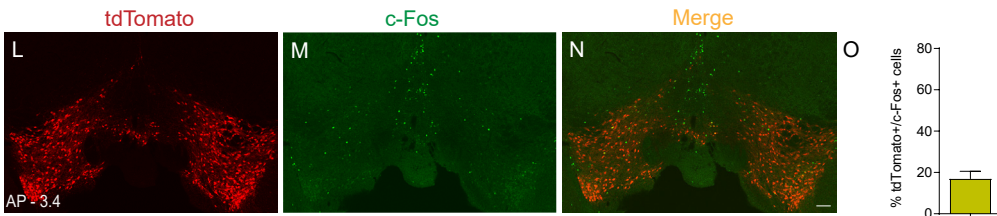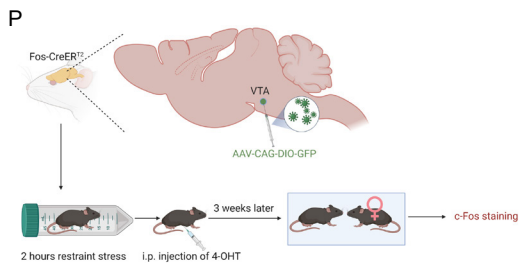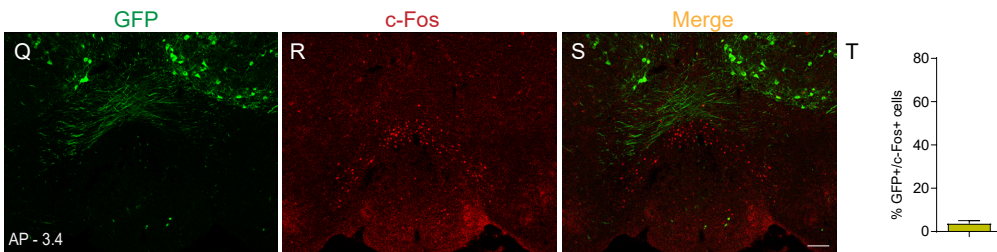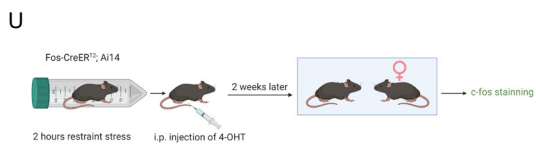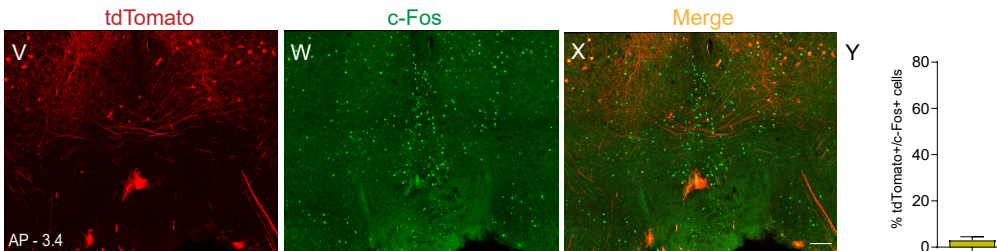

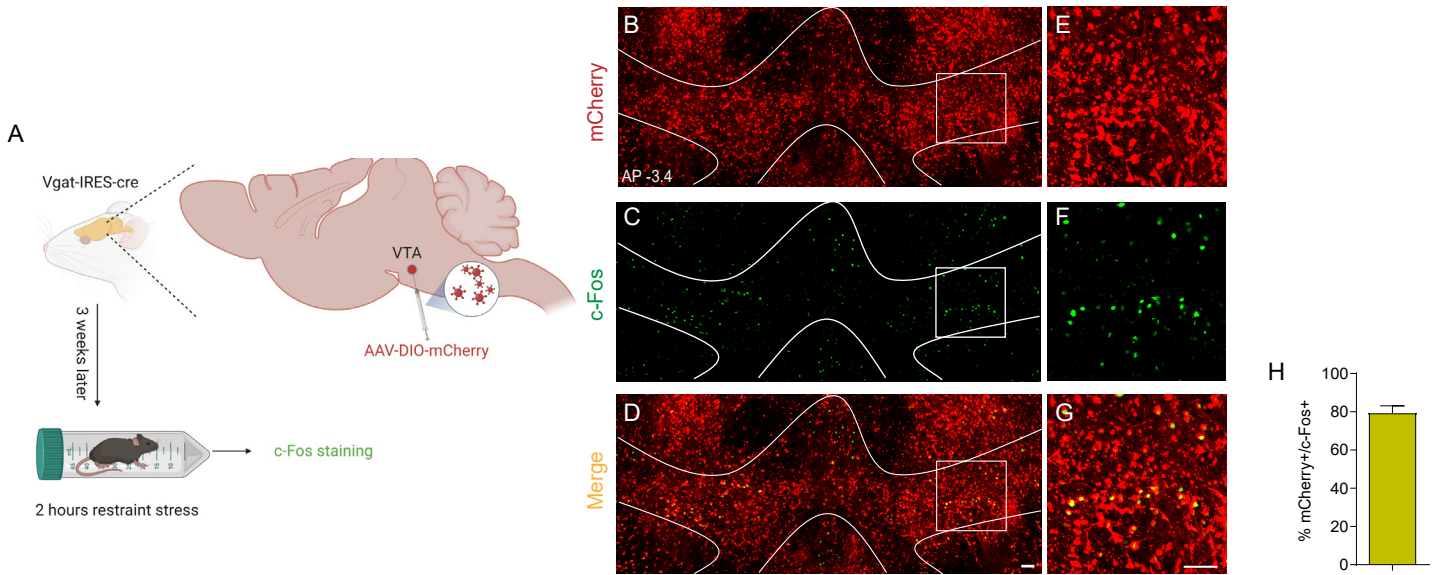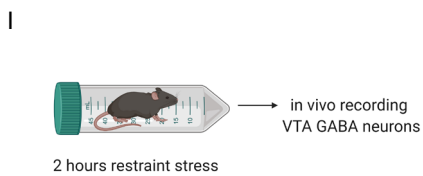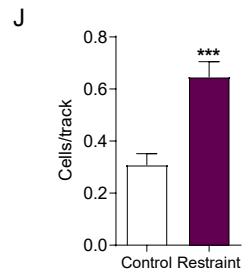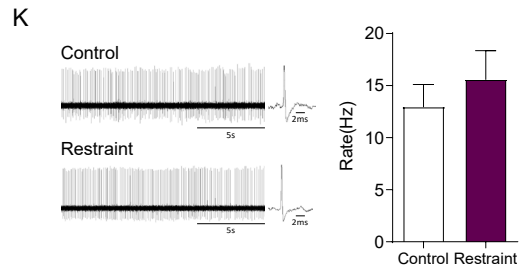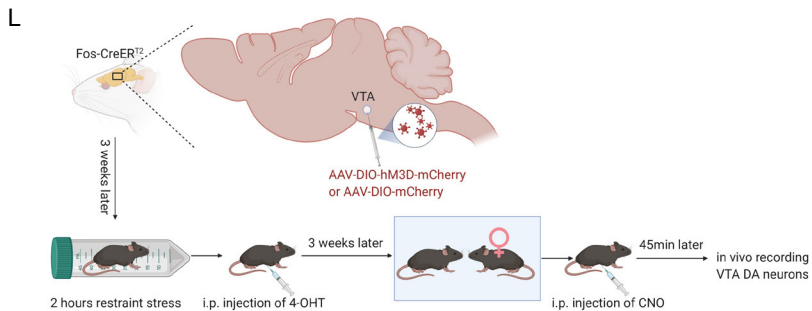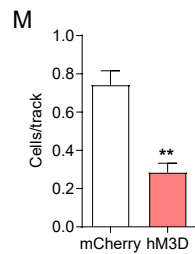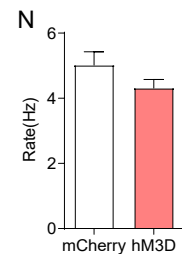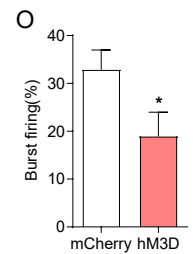

Source: http://biorxiv.org/content/10.1101/2021.01.20.427537v1.full.pdf
